# Supplementary material for: Traditional media vs. new media: Impact of socio-demographic variables on media user behaviour across EU regions
Source: Research Square preprint supplement (doi:10.21203/rs.3.rs-6588184/v1), 2025-07-22
Supplement: Supplementary file 1 [file 6b037f3751b8ee34cb5e4aa1.docx]

**Traditional media vs new media: Impact of socio-demographic variables on media user behaviour across EU regions**

**Supplemental Materials**

**Table of contents**

**Appendix 1 Information regarding our data analysis results**

- Tables

Table A1: Grouping of the European countries by regions and number of respondents

Table A2: Respondents characteristics at total population level

Table A3: Excerpt from the questionnaire containing the items utilized in our analysis

Table A4: Regional descriptive statistics for the studied variables

Table A5: Parameter estimates for the first multinomial logistic regression

Table A6: Parameter estimates for the second multinomial logistic regression

**Appendix 2 Details regarding regression models estimation**

- Ordinal regression model
- Multinomial logistic regression

Table A1: Grouping of the European countries by regions and number of respondents

| **Region name** | **Country** | **Code** | **Number of respondents** | |
| --- | --- | --- | --- | --- |
| Count | % |
| Western Europe | Austria | AT | 1034 | 4.0% |
| Belgium | BE | 1026 | 4.0% |
| France | FR | 1010 | 3.9% |
| Germany | DE | 1021 | 3.9% |
| Luxembourg | LU | 515 | 2.0% |
| Netherlands | NL | 1013 | 3.9% |
| Southern Europe | Republic of Croatia | HR | 1012 | 3.9% |
| Greece | GT | 1025 | 4.0% |
| Italy | IT | 1014 | 3.9% |
| Malta | MT | 512 | 2.0% |
| Portugal | PT | 1000 | 3.9% |
| Slovenia | SI | 1013 | 3.9% |
| Spain | ES | 1019 | 3.9% |
| Northern Europe | Denmark | DK | 1015 | 3.9% |
| Estonia | EE | 1005 | 3.9% |
| Finland | FI | 1010 | 3.9% |
| Ireland | IE | 1044 | 4.0% |
| Latvia | LV | 1029 | 4.0% |
| Lithuania | LT | 1006 | 3.9% |
| Sweden | SE | 1034 | 4.0% |
| Eastern Europe | Bulgaria | BG | 1021 | 3.9% |
| Rep. of Cyprus | CY | 510 | 2.0% |
| Czech Republic | CZ | 1016 | 3.9% |
| Hungary | HU | 1018 | 3.9% |
| Poland | PL | 1012 | 3.9% |
| Romania | RO | 1004 | 3.9% |
| Slovakia | SK | 1000 | 3.9% |
| **Total** | | | **25938** | **100%** |

Source: <https://unstats.un.org/unsd/methodology/m49/overview/>

Table A2: Respondents characteristics at total population level

| **Characteristics** | **Frequency** | **Percentage (%)** |
| --- | --- | --- |
| **Gender** | | |
| Male | 12521 | 48.3% |
| Female | 13352 | 51.5% |
| In another way/Prefer not to say | 65 | 0.3% |
| **Total** | **25938** | **100%** |
| **Age Education** | | |
| Up to 15 | 807 | 3.1% |
| 16-19 | 8204 | 31.6% |
| 20 years and older | 12746 | 49.1% |
| Still in full-time education | 2306 | 8.9% |
| Never been in full-time education | 503 | 1.9% |
| Don't know | 985 | 3.8% |
| Refusal | 387 | 1.5% |
| **Total** | **25938** | **100%** |
| **Occupation of respondent** | | |
| Self-employed | 2980 | 11.5% |
| Employee | 12206 | 47.1% |
| Manual worker | 1722 | 6.6% |
| Without a professional activity | 8263 | 31.9% |
| Refusal | 767 | 3.0% |
| **Total** | **25938** | **100%** |
| **Type of community** | | |
| Rural area or village | 6448 | 24.9% |
| Small or middle-sized town | 10295 | 39.7% |
| Large town | 9195 | 35.4% |
| **Total** | **25938** | **100%** |

Table A3: Excerpt from the questionnaire containing the items utilized in our analysis

| **Dimension** | **Question code** | **Question/Item** | **Answer options** |
| --- | --- | --- | --- |
| Media consumption | Q1 | Have you recently read in the press, seen on the Internet or on television or heard on the radio something about the European Union?  [SINGLE ANSWER] | 1= Yes  2 = No  9 = Don’t know |
| Q2a | Among the following, what media have you used the most to access news in the past 7 days?  [SINGLE ANSWER] | 1 = Radio  2 = TV  3 = Written (printed) press (e.g. newspapers, weekly or monthly magazine, etc.)  4 = Online press and/or news platforms  5 = Video platforms (e.g. YouTube, etc.)  6 = Podcasts  7 = Social media platforms (e.g. Facebook, Instagram, etc.)  8 = Messaging apps (e.g. WhatsApp, Messenger, etc.)  9 = Blogs  10 = You haven’t accessed news in the last 7 days / You do not access news on a regular basis  998 = Don’t know |
| Q3 | How do you usually access news online?  [MULTIPLE ANSWERS ALLOWED]  [RANDOMISE ITEMS 1-6] [CODE 8 AND CODE 998 ARE EXCLUSIVE] | 1 = You directly go to the website or app of the news source, e.g. the website of a newspaper, a magazine, or a TV channel  2 = You use a news aggregator app or website, meaning a website or app that assembles information from different sources according to your preselected interests  3 = You read articles or posts that appear in your online social networks  4 = You read content shared by friends on direct messaging apps (e.g. WhatsApp, Messenger, etc.)  5 = Via notifications from news apps you registered to or via alerts you receive \  6 = Via email newsletter(s) you receive  7 = Other  8 = You never access news online  998 = Don’t know |
| News topics | Q6 | Thinking about news and other information, which of the following topics have you accessed in the past 7 days?  [MULTIPLE ANSWERS ALLOWED]  [RANDOMISE ITEMS 1-10] [CODE 12 AND CODE 998 ARE EXCLUSIVE | 1 = Local news  2 = National politics  3 = European and international affairs  4 = Science and technology  5 = Sport  6 = Financial and economic news  7 = Culture and art  8 = People (e.g. royals, celebrities, etc.)  9 = Hobbies, lifestyle  10 = Crime, accidents  11 = Other  12 = None  998 = Don’t know |
| Trust in news sources | Q7 | Which news sources do you trust the most? (max 3 answers)  [MAX. 3 ANSWERS] [RANDOMISE ITEMS 1-7] [CODE 998 IS EXCLUSIVE] | 1 = Public TV and radio stations (incl. their online presence  2 = Private TV and radio stations (incl. their online presence)  3 = The written press (such as newspapers or magazines), incl. their online presence  4 = Other online news platforms incl. blogs, podcasts  5 = YouTube or other video platforms  6 = People, groups or friends I follow on social media or messaging platforms  7 = Influencers on social media channels (e.g. YouTube, Instagram, TikTok etc.)  8 = Other  998 = Don’t know |
| News consumption habits | Q8 | Which of the following statements best describes the way you approach news?  [SINGLE ANSWER] | 1 = You actively search news several times a day  2 = You follow the news on a daily basis  3 = You follow the news from time to time  4 = You are trying to avoid some news topics  5 = You actively avoid all news  9 = Don’t know |
| Demographic and regional context | D1 | How old, are you?  [Stop interview if <15] | _______________ years |
| D2 | Which of the following describes how you think of yourself?  [SINGLE ANSWER] | 1 = Male  2 = Female  3 = In another way  4 = Prefer not to say |
| D3b | Which nationality or nationalities do you hold? Select all that apply.  [MULTIPLE ANSWERS] | 1 = Belgian, 2 = Danish, 3 = German, 4 = Greek, 5 = Spanish, 6 = Finnish, 7 = French, 8 = Irish, 9 = Italian, 10 = Luxembourgish, 11 = Dutch, 12 = Austrian, 13 = Portuguese, 14 = Swedish, 16 = Bulgarian, 17 =Cyprian, 18 = Czech, 19 = Estonian, 20 = Hungarian, 21 = Latvian, 22 = Lithuanian, 23 = Maltese, 24 = Polish, 25 = Romanian, 26 = Slovak, 27 = Slovenian, 28 =Croatian, 998 = Other, 999 = Refusal |
| D4 | How old were you when you stopped full-time education? | years  996 = Still in full-time education  997 = Never been in full-time education  998 = Don't know  999 = Refusal |
| D5a | As far as your current occupation is concerned, would you say you are...?  [SINGLE ANSWER] | 1 = Self-employed  2 = Employee  3 = Manual worker  4 = Without a professional activity  999 = Refusal |
| D13 | Would you say you live in...?  [SINGLE ANSWER] | 1 = A rural area or village  2 = Small or medium-sized town  3 = Large town/city  998 = Don't know |

Table A4: Regional descriptive statistics for the studied variables

| **Variable** | | **Region** | | | | | | | |
| --- | --- | --- | --- | --- | --- | --- | --- | --- | --- |
| **Western Europe** | | **Southern Europe** | | **Northern Europe** | | **Eastern Europe** | |
| **Count** | **%** | **Count** | **%** | **Count** | **%** | **Count** | **%** |
| **Q1 (Have you recently read in the press, seen on the Internet or on television or heard on the radio something about the European Union?)** | | | | | | | | | |
| Yes | | 3448 | 61.4% | 5291 | 80.2% | 5485 | 76.8% | 5261 | 79.9% |
| No | | 1677 | 29.8% | 1018 | 15.4% | 1172 | 16.4% | 961 | 14.6% |
| Don’t know | | 494 | 8.8% | 286 | 4.3% | 486 | 6.8% | 359 | 5.5% |
| **Total** | | **5619** | **100%** | **6595** | **100%** | **7143** | **100%** | **6581** | **100%** |
| **Q2a (Among the following, what media have you used the most to access news in the past 7 days?)** | | | | | | | | | |
| Radio | | 816 | 28.1% | 612 | 21.1% | 882 | 30.4% | 594 | 20.5% |
| TV | | 1856 | 21.9% | 2255 | 26.6% | 2079 | 24.5% | 2292 | 27.0% |
| Written (printed) press  (e.g. newspapers, weekly or monthly magazine, etc.) | | 489 | 34.9% | 337 | 24.1% | 391 | 27.9% | 184 | 13.1% |
| Online press and/or news platforms | | 799 | 17.7% | 1230 | 27.2% | 1405 | 31.0% | 1091 | 24.1% |
| Video platforms (e.g. YouTube, etc.) | | 292 | 18.3% | 397 | 24.8% | 460 | 28.7% | 451 | 28.2% |
| Podcasts | | 92 | 16.7% | 100 | 18.2% | 156 | 28.4% | 202 | 36.7% |
| Social media platforms (e.g. Facebook, Instagram, etc.) | | 749 | 17.8% | 1076 | 25.6% | 1209 | 28.7% | 1174 | 27.9% |
| Messaging apps (e.g. WhatsApp, Messenger, etc.) | | 287 | 24.2% | 313 | 26.4% | 283 | 23.9% | 303 | 25.5% |
| Blogs | | 49 | 9.8% | 182 | 36.5% | 145 | 29.1% | 123 | 24.6% |
| None of these accessed in the last 7 days for news | | 115 | 28.8% | 66 | 16.5% | 90 | 22.6% | 128 | 32.1% |
| Don’t know | | 75 | 40.8% | 27 | 14.7% | 43 | 23.4% | 39 | 21.2% |
| **Total** | | **5619** | **100%** | **6595** | **100%** | **7143** | **100%** | **6581** | **100%** |
| **Q3 (How do you usually access news online?)** | | | | | | | | | |
| You directly go to the website or app of the news source, e.g. the website of a newspaper, a magazine, or a TV channel | Not mentioned | 3251 | 57.9% | 3619 | 54.9% | 3416 | 47.8% | 3626 | 55.1% |
| Mentioned | 2368 | 42.1% | 2976 | 45.1% | 3727 | 52.2% | 2955 | 44.9% |
| **Total** | **5619** | **100%** | **6595** | **100%** | **7143** | **100%** | **6581** | **100%** |
| You use a news aggregator app or website, meaning a website or app that assembles information from different (...). | Not mentioned | 4581 | 81.5% | 5198 | 78.8% | 5806 | 81.3% | 5362 | 81.5% |
| Mentioned | 1038 | 18.5% | 1397 | 21.2% | 1337 | 18.7% | 1219 | 18.5% |
| **Total** | **5619** | **100%** | **6595** | **100%** | **7143** | **100%** | **6581** | **100%** |
| You read articles or posts that appear in your online social networks | Not mentioned | 4208 | 74.9% | 4044 | 61.3% | 4745 | 66.4% | 3890 | 59.1% |
| Mentioned | 1411 | 25.1% | 2551 | 38.7% | 2398 | 33.6% | 2691 | 40.9% |
| **Total** | **5619** | **100%** | **6595** | **100%** | **7143** | **100%** | **6581** | **100%** |
| You read content shared by friends on direct messaging apps (e.g. WhatsApp, Messenger, etc.) | Not mentioned | 4862 | 86.5% | 5504 | 83.5% | 6147 | 86.1% | 5428 | 82.5% |
| Mentioned | 757 | 13.5% | 1091 | 16.5% | 996 | 13.9% | 1153 | 17.5% |
| **Total** | **5619** | **100%** | **6595** | **100%** | **7143** | **100%** | **6581** | **100%** |
| Via notifications from news apps you registered to or via alerts you receive | Not mentioned | 4616 | 82.1% | 5351 | 81.1% | 6046 | 84.6% | 5435 | 82.6% |
| Mentioned | 1003 | 17.9% | 1244 | 18.9% | 1097 | 15.4% | 1146 | 17.4% |
| **Total** | **5619** | **100%** | **6595** | **100%** | **7143** | **100%** | **6581** | **100%** |
| Via email newsletter(s) you receive | Not mentioned | 4931 | 87.8% | 5933 | 90.0% | 6493 | 90.9% | 5871 | 89.2% |
| Mentioned | 688 | 12.2% | 662 | 10.0% | 650 | 9.1% | 710 | 10.8% |
| **Total** | **5619** | **100%** | **6595** | **100%** | **7143** | **100%** | **6581** | **100%** |
| Other | Not mentioned | 5301 | 94.3% | 6350 | 96.3% | 6916 | 96.8% | 6332 | 96.2% |
| Mentioned | 318 | 5.7% | 245 | 3.7% | 227 | 3.2% | 249 | 3.8% |
| **Total** | **5619** | **100%** | **6595** | **100%** | **7143** | **100%** | **6581** | **100%** |
| You never access news online | Not mentioned | 5036 | 89.6% | 6325 | 95.9% | 6873 | 96.2% | 6269 | 95.3% |
| Mentioned | 583 | 10.4% | 270 | 4.1% | 270 | 3.8% | 312 | 4.7% |
| **Total** | **5619** | **100%** | **6595** | **100%** | **7143** | **100%** | **6581** | **100%** |
| Don’t know | Not mentioned | 6474 | 98.4% | 6516 | 98.8% | 7017 | 98.2% | 6474 | 98.4% |
| Mentioned | 107 | 1.6% | 79 | 1.2% | 126 | 1.8% | 107 | 1.6% |
| **Total** | **5619** | **100%** | **6595** | **100%** | **7143** | **100%** | **6581** | **100%** |
| **Q6 (Thinking about news and other information, which of the following topics have you accessed in the past 7 days?)** | | | | | | | | | |
| Local news | Not mentioned | 2966 | 52.8% | 3049 | 46.2% | 2962 | 41.5% | 3425 | 52.0% |
| Mentioned | 2653 | 47.2% | 3546 | 53.8% | 4181 | 58.5% | 3156 | 48.0% |
| **Total** | **5619** | **100%** | **6595** | **100%** | **7143** | **100%** | **6581** | **100%** |
| National politics | Not mentioned | 3218 | 57.3% | 3536 | 53.6% | 4005 | 56.1% | 3534 | 53.7% |
| Mentioned | 2401 | 42.7% | 3059 | 46.4% | 3138 | 43.9% | 3047 | 46.3% |
| **Total** | **5619** | **100%** | **6595** | **100%** | **7143** | **100%** | **6581** | **100%** |
| European and international affairs | Not mentioned | 3067 | 54.6% | 3497 | 53.0% | 3717 | 52.0% | 3553 | 54.0% |
| Mentioned | 2552 | 45.4% | 3098 | 47.0% | 3426 | 48.0% | 3028 | 46.0% |
| **Total** | **5619** | **100%** | **6595** | **100%** | **7143** | **100%** | **6581** | **100%** |
| Science and technology | Not mentioned | 4310 | 76.7% | 4448 | 67.4% | 5114 | 71.6% | 4601 | 69.9% |
| Mentioned | 1309 | 23.3% | 2147 | 32.6% | 2029 | 28.4% | 1980 | 30.1% |
| **Total** | **5619** | **100%** | **6595** | **100%** | **7143** | **100%** | **6581** | **100%** |
| Sport | Not mentioned | 3695 | 65.8% | 3944 | 59.8% | 4645 | 65.0% | 4361 | 66.3% |
| Mentioned | 1924 | 34.2% | 2651 | 40.2% | 2498 | 35.0% | 2220 | 33.7% |
| **Total** | **5619** | **100%** | **6595** | **100%** | **7143** | **100%** | **6581** | **100%** |
| Financial and economic news | Not mentioned | 4084 | 72.7% | 4363 | 66.2% | 4735 | 66.3% | 4201 | 63.8% |
| Mentioned | 1535 | 27.3% | 2232 | 33.8% | 2408 | 33.7% | 2380 | 36.2% |
| **Total** | **5619** | **100%** | **6595** | **100%** | **7143** | **100%** | **6581** | **100%** |
| Culture and art | Not mentioned | 4641 | 82.6% | 4838 | 73.4% | 5462 | 76.5% | 4969 | 75.5% |
| Mentioned | 978 | 17.4% | 1757 | 26.6% | 1681 | 23.5% | 1612 | 24.5% |
| **Total** | **5619** | **100%** | **6595** | **100%** | **7143** | **100%** | **6581** | **100%** |
| People (e.g. royals, celebrities, etc.) | Not mentioned | 4541 | 80.8% | 5526 | 83.8% | 5593 | 78.3% | 5315 | 80.8% |
| Mentioned | 1078 | 19.2% | 1069 | 16.2% | 1550 | 21.7% | 1266 | 19.2% |
| **Total** | **5619** | **100%** | **6595** | **100%** | **7143** | **100%** | **6581** | **100%** |
| Hobbies, lifestyle | Not mentioned | 4458 | 79.3% | 4903 | 74.3% | 5193 | 72.7% | 4695 | 71.3% |
| Mentioned | 1161 | 20.7% | 1692 | 25.7% | 1950 | 27.3% | 1886 | 28.7% |
| **Total** | **5619** | **100%** | **6595** | **100%** | **7143** | **100%** | **6581** | **100%** |
| Crime, accidents | Not mentioned | 3658 | 65.1% | 4441 | 67.3% | 4387 | 61.4% | 4704 | 71.5% |
| Mentioned | 1961 | 34.9% | 2154 | 32.7% | 2756 | 38.6% | 1877 | 28.5% |
| **Total** | **5619** | **100%** | **6595** | **100%** | **7143** | **100%** | **6581** | **100%** |
| Other | Not mentioned | 5211 | 92.7% | 6227 | 94.4% | 6739 | 94.3% | 6245 | 94.9% |
| Mentioned | 408 | 7.3% | 368 | 5.6% | 404 | 5.7% | 336 | 5.1% |
| **Total** | **5619** | **100%** | **6595** | **100%** | **7143** | **100%** | **6581** | **100%** |
| None | Not mentioned | 5201 | 92.6% | 6396 | 97.0% | 6937 | 97.1% | 6338 | 96.3% |
| Mentioned | 418 | 7.4% | 199 | 3.0% | 206 | 2.9% | 243 | 3.7% |
| **Total** | **5619** | **100%** | **6595** | **100%** | **7143** | **100%** | **6581** | **100%** |
| Don’t know | Not mentioned | 5503 | 97.9% | 6511 | 98.7% | 7022 | 98.3% | 6477 | 98.4% |
| Mentioned | 116 | 2.1% | 84 | 1.3%q | 121 | 1.7% | 104 | 1.6% |
| **Total** | **5619** | **100%** | **6595** | **100%** | **7143** | **100%** | **6581** | **100%** |
| **Q7 (Which news sources do you trust the most?)** | | | | | | | | | |
| Public TV and Radio stations (incl. their online presence) | Not mentioned | 2600 | 46.3% | 3512 | 53.3% | 2901 | 40.6% | 4004 | 60.8% |
| Mentioned | 3019 | 53.7% | 3083 | 46.7% | 4242 | 59.4% | 2577 | 39.2% |
| **Total** | **5619** | **100%** | **6595** | **100%** | **7143** | **100%** | **6581** | **100%** |
| Private TV and Radio stations (incl. their online presence) | Not mentioned | 4189 | 74.6% | 4401 | 66.7% | 5701 | 79.8% | 4689 | 71.3% |
| Mentioned | 1430 | 25.4% | 2194 | 33.3% | 1442 | 20.2% | 1892 | 28.7% |
| **Total** | **5619** | **100%** | **6595** | **100%** | **7143** | **100%** | **6581** | **100%** |
| The written press (such as newspapers or magazines), incl. their online presence | Not mentioned | 3021 | 53.8% | 4130 | 62.6% | 4122 | 57.7% | 5072 | 77.1% |
| Mentioned | 2598 | 46.2% | 2465 | 37.4% | 3021 | 42.3% | 1509 | 22.9% |
| **Total** | **5619** | **100%** | **6595** | **100%** | **7143** | **100%** | **6581** | **100%** |
| Other online news platforms incl. blogs, podcasts | Not mentioned | 5139 | 91.5% | 5452 | 82.7% | 6259 | 87.6% | 5289 | 80.4% |
| Mentioned | 480 | 8.5% | 1143 | 17.3% | 884 | 12.4% | 1292 | 19.6% |
| **Total** | **5619** | **100%** | **6595** | **100%** | **7143** | **100%** | **6581** | **100%** |
| YouTube or other video platforms | Not mentioned | 5014 | 89.2% | 5708 | 86.6% | 6106 | 85.5% | 5253 | 79.8% |
| Mentioned | 605 | 10.8% | 887 | 13.4% | 1037 | 14.5% | 1328 | 20.2% |
| **Total** | **5619** | **100%** | **6595** | **100%** | **7143** | **100%** | **6581** | **100%** |
| Influencers on social media channels (e.g. YouTube, Instagram, TikTok etc.) | Not mentioned | 5199 | 92.5% | 6095 | 92.4% | 6370 | 89.2% | 5864 | 89.1% |
| Mentioned | 420 | 7.5% | 500 | 7.6% | 773 | 10.8% | 717 | 10.9% |
| **Total** | **5619** | **100%** | **6595** | **100%** | **7143** | **100%** | **6581** | **100%** |
| Other | Not mentioned | 5302 | 94.4% | 6181 | 93.7% | 6854 | 96.0% | 6177 | 93.9% |
| Mentioned | 317 | 5.6% | 414 | 6.3% | 289 | 4.0% | 404 | 6.1% |
| **Total** | **5619** | **100%** | **6595** | **100%** | **7143** | **100%** | **6581** | **100%** |
| Don’t know | Not mentioned | 5018 | 89.3% | 5986 | 90.8% | 6590 | 92.3% | 5941 | 90.3% |
| Mentioned | 601 | 10.7% | 609 | 9.2% | 553 | 7.3% | 640 | 9.7% |
| **Total** | **5619** | **100%** | **6595** | **100%** | **7143** | **100%** | **6581** | **100%** |
| **Q8 (Which of the following statements best describes the way you approach news?)** | | | | | | | | | |
| You actively search news several times a day | | 1401 | 24.9% | 1534 | 23.3% | 1756 | 24.6% | 1473 | 22.4% |
| You follow the news on a daily basis | | 2517 | 44.8% | 3056 | 46.3% | 3077 | 43.1% | 2651 | 40.3% |
| You follow the news from time to time | | 1072 | 19.1% | 1284 | 19.5% | 1608 | 22.5% | 1547 | 23.5% |
| You are trying to avoid some news topics | | 331 | 5.9% | 413 | 6.3% | 415 | 5.8% | 540 | 8.2% |
| You actively avoid all news | | 166 | 3.0% | 200 | 3.0% | 156 | 2.2% | 240 | 3.6% |
| Don’t know | | 132 | 2.3% | 108 | 1.6% | 131 | 1.8% | 130 | 2.0% |
| **Total** | | **5619** | **100%** | **6595** | **100%** | **7143** | **100%** | **6581** | **100%** |
| **D1 (Age)** | | | | | | | | | |
| 15-24 years | | 754 | 13.4% | 781 | 11.8% | 945 | 13.2% | 809 | 12.3% |
| 25-39 years | | 1284 | 22.9% | 1454 | 22.0% | 1737 | 24.3% | 1685 | 25.6% |
| 40-54 years | | 1386 | 24.7% | 1782 | 27.0% | 1691 | 23.7% | 1687 | 25.6% |
| 55 years and older | | 2195 | 39.1% | 2578 | 39.1% | 2770 | 38.8% | 2400 | 36.5% |
| **Total** | | **5619** | **100%** | **6595** | **100%** | **7143** | **100%** | **6581** | **100%** |
| **D2 (Gender)** | | | | | | | | | |
| Male | | 2737 | 48.7% | 3263 | 49.5% | 3383 | 47.4% | 3138 | 47.7% |
| Female | | 2872 | 51.1% | 3319 | 50.3% | 3732 | 52.2% | 3429 | 52.1% |
| In other way/Prefer not to say | | 10 | 0.2% | 13 | 0.2% | 28 | 0.4% | 14 | 0.2% |
| **Total** | | **5619** | **100%** | **6595** | **100%** | **7143** | **100%** | **6581** | **100%** |
| **D4 (Age education)** | | | | | | | | | |
| Up to 15 | | 272 | 4.8% | 229 | 3.5% | 168 | 2.4% | 138 | 2.1% |
| 16-19 | | 1892 | 33.7% | 2218 | 33.6% | 1926 | 27.0% | 2168 | 32.9% |
| 20 years and older | | 2589 | 46.1% | 3118 | 47.3% | 3719 | 52.1% | 3320 | 50.4% |
| Still in full time education | | 477 | 8.5% | 619 | 9.4% | 618 | 8.7% | 592 | 9.0% |
| Never been in full time education | | 99 | 1.8% | 111 | 1.7% | 214 | 3.0% | 79 | 1.2% |
| Don’t know | | 190 | 3.4% | 223 | 3.4% | 359 | 5.0% | 213 | 3.2% |
| Refusal | | 100 | 1.8% | 77 | 1.2% | 139 | 1.9% | 71 | 1.1% |
| **Total** | | **5619** | **100%** | **6595** | **100%** | **7143** | **100%** | **6581** | **100%** |
| **D5a (Occupation of respondent)** | | | | | | | | | |
| Self employed | | 542 | 9.6% | 895 | 13.6% | 828 | 11.6% | 715 | 10.9% |
| Employee | | 2694 | 47.9% | 3099 | 47.0% | 3110 | 43.5% | 3303 | 50.2% |
| Manual worker | | 291 | 5.2% | 232 | 3.5% | 810 | 11.3% | 389 | 5.9% |
| Without a professional activity | | 1958 | 34.8% | 2161 | 32.8% | 2136 | 29.9% | 2008 | 30.5% |
| Refusal | | 134 | 2.4% | 208 | 3.2% | 259 | 3.6% | 166 | 2.5% |
| **Total** | | **5619** | **100.0%** | **6595** | **100.0%** | **7143** | **100.0%** | **6581** | **100.0%** |
| **D13 (Type of community)** | | | | | | | | | |
| Rural area or village | | 2010 | 35.8% | 1372 | 20.8% | 1723 | 24.1% | 1343 | 20.4% |
| Small or middle-sized town | | 2132 | 37.9% | 2927 | 44.4% | 2580 | 36.1% | 2656 | 40.4% |
| Large town | | 1477 | 26.3% | 2296 | 34.8% | 2840 | 39.8% | 2582 | 39.2% |
| **Total** | | **5619** | **100.0%** | **6595** | **100.0%** | **7143** | **100.0%** | **6581** | **100.0%** |

Table A5: Parameter estimates for the first multinomial logistic regression

| Q8 Which of the following statements best describes the way you approach news?a | | | B | Std. Error | Wald | df | p-value | Exp(B) | 95% Confidence Interval for Exp(B) | |
| --- | --- | --- | --- | --- | --- | --- | --- | --- | --- | --- |
| Lower Bound | Upper Bound |
| You follow the news on a daily basis | Intercept | | .737 | .423 | 3.040 | 1 | 0.081 |  |  |  |
| Type of community | Rural area or village | .086 | .043 | 4.056 | 1 | 0.044 | 1.090 | 1.002 | 1.185 |
| Small or middle-sized town | .044 | .037 | 1.442 | 1 | 0.230 | 1.045 | .973 | 1.123 |
| Large town | 0b | . | . | 0 | . | . | . | . |
| Region | Western Europe | -.028 | .047 | .344 | 1 | 0.557 | .973 | .886 | 1.067 |
| Southern Europe | .102 | .045 | 4.986 | 1 | 0.026 | 1.107 | 1.012 | 1.210 |
| Northern Europe | -.024 | .045 | .289 | 1 | 0.591 | .976 | .894 | 1.066 |
| Eastern Europe | 0b | . | . | 0 | . | . | . | . |
| Age education | Up to 15 | .066 | .180 | .134 | 1 | 0.714 | 1.068 | .750 | 1.521 |
| 16-19 | .005 | .156 | .001 | 1 | 0.972 | 1.006 | .741 | 1.364 |
| 20 years and older | -.107 | .155 | .481 | 1 | 0.488 | .898 | .664 | 1.216 |
| Still in full time education | -.108 | .168 | .410 | 1 | 0.522 | .898 | .646 | 1.248 |
| Never been in full time education | -.005 | .200 | .001 | 1 | 0.982 | .996 | .672 | 1.474 |
| Don’t know | -.074 | .178 | .172 | 1 | 0.678 | .929 | .656 | 1.316 |
| Refusal | 0b | . | . | 0 | . | . | . | . |
| Gender | Male | -.126 | .384 | .107 | 1 | 0.743 | .882 | .415 | 1.872 |
| Female | .289 | .384 | .565 | 1 | .452 | 1.335 | .629 | 2.834 |
| In other way/Prefer not to say | 0b | . | . | 0 | . | . | . | . |
| Age | 15-24 years | -.144 | .070 | 4.290 | 1 | .038 | .866 | .755 | .992 |
| 25-39 years | .013 | .046 | .079 | 1 | .779 | 1.013 | .925 | 1.110 |
| 40-54 years | .049 | .043 | 1.298 | 1 | .255 | 1.051 | .965 | 1.144 |
| 55 years and older | 0b | . | . | 0 | . | . | . | . |
| Occupation | Self employed | -.403 | .116 | 12.091 | 1 | .001 | .668 | .532 | .839 |
| Employee | -.221 | .110 | 4.044 | 1 | .044 | .801 | .646 | .994 |
| Manual worker | -.265 | .126 | 4.415 | 1 | .036 | .768 | .600 | .982 |
| Without a professional activity | -.062 | .110 | .319 | 1 | .572 | .940 | .758 | 1.166 |
| Refusal | 0b | . | . | 0 | . | . | . | . |
| You follow the news from time to time | Intercept | | .263 | .441 | .355 | 1 | .551 |  |  |  |
| Type of community | Rural area or village | .253 | .051 | 24.785 | 1 | .000 | 1.287 | 1.165 | 1.422 |
| Small or middle-sized town | .125 | .044 | 7.962 | 1 | .005 | 1.134 | 1.039 | 1.237 |
| Large town | 0b | . | . | 0 | . | . | . | . |
| Region | Western Europe | -.391 | .057 | 47.577 | 1 | .000 | .676 | .605 | .756 |
| Southern Europe | -.221 | .054 | 16.638 | 1 | .000 | .802 | .721 | .892 |
| Northern Europe | -.163 | .052 | 9.809 | 1 | .002 | .849 | .767 | .941 |
| Eastern Europe | 0b | . | . | 0 | . | . | . | . |
| Age education | Up to 15 | -.073 | .199 | .133 | 1 | .715 | .930 | .629 | 1.374 |
| 16-19 | -.262 | .168 | 2.425 | 1 | .119 | .770 | .554 | 1.070 |
| 20 years and older | -.688 | .167 | 16.995 | 1 | .000 | .502 | .362 | .697 |
| Still in full time education | -.290 | .179 | 2.639 | 1 | .104 | .748 | .527 | 1.062 |
| Never been in full time education | -.124 | .216 | .330 | 1 | .566 | .883 | .578 | 1.349 |
| Don’t know | -.144 | .192 | .564 | 1 | .453 | .866 | .594 | 1.261 |
| Refusal | 0b | . | . | 0 | . | . | . | . |
| Gender | Male | -.581 | .396 | 2.152 | 1 | .142 | .559 | .257 | 1.216 |
| Female | .111 | .396 | .078 | 1 | .780 | 1.117 | .514 | 2.429 |
| In other way/Prefer not to say | 0b | . | . | 0 | . | . | . | . |
| Age | 15-24 years | 1.451 | .073 | 394.772 | 1 | .000 | 4.269 | 3.700 | 4.926 |
| 25-39 years | 1.046 | .056 | 349.881 | 1 | .000 | 2.847 | 2.551 | 3.176 |
| 40-54 years | .588 | .056 | 112.230 | 1 | .000 | 1.800 | 1.615 | 2.007 |
| 55 years and older | 0b | . | . | 0 | . | . | . | . |
| Occupation | Self employed | -.615 | .134 | 21.032 | 1 | .000 | .541 | .416 | .703 |
| Employee | -.208 | .125 | 2.768 | 1 | .096 | .812 | .635 | 1.038 |
| Manual worker | -.161 | .141 | 1.300 | 1 | .254 | .851 | .645 | 1.123 |
| Without a professional activity | -.227 | .126 | 3.264 | 1 | .071 | .797 | .623 | 1.019 |
| Refusal | 0b | . | . | 0 | . | . | . | . |
| You are trying to avoid some news topics | Intercept | | -.089 | .551 | .026 | 1 | .872 |  |  |  |
| Type of community | Rural area or village | .248 | .075 | 11.022 | 1 | .001 | 1.281 | 1.107 | 1.483 |
| Small or middle-sized town | .206 | .065 | 9.968 | 1 | .002 | 1.229 | 1.081 | 1.396 |
| Large town | 0b | . | . | 0 | . | . | . | . |
| Region | Western Europe | -.510 | .081 | 39.428 | 1 | .000 | .600 | .512 | .704 |
| Southern Europe | -.310 | .076 | 16.567 | 1 | .000 | .733 | .631 | .851 |
| Northern Europe | -.511 | .076 | 44.985 | 1 | .000 | .600 | .516 | .696 |
| Eastern Europe | 0b | . | . | 0 | . | . | . | . |
| Age education | Up to 15 | -.190 | .263 | .523 | 1 | .470 | .827 | .494 | 1.384 |
| 16-19 | -.571 | .217 | 6.933 | 1 | .008 | .565 | .369 | .864 |
| 20 years and older | -.835 | .215 | 15.038 | 1 | .000 | .434 | .285 | .662 |
| Still in full time education | -.515 | .230 | 5.015 | 1 | .025 | .597 | .381 | .938 |
| Never been in full time education | -.105 | .278 | .143 | 1 | .706 | .900 | .522 | 1.553 |
| Don’t know | -.192 | .249 | .596 | 1 | .440 | .825 | .507 | 1.344 |
| Refusal | 0b | . | . | 0 | . | . | . | . |
| Gender | Male | -.957 | .492 | 3.780 | 1 | .052 | .384 | .146 | 1.008 |
| Female | -.108 | .492 | .048 | 1 | .826 | .898 | .342 | 2.354 |
| In other way/Prefer not to say | 0b | . | . | 0 | . | . | . | . |
| Age | 15-24 years | 1.485 | .101 | 214.906 | 1 | .000 | 4.414 | 3.619 | 5.383 |
| 25-39 years | 1.057 | .083 | 161.637 | 1 | .000 | 2.878 | 2.445 | 3.387 |
| 40-54 years | .619 | .085 | 53.634 | 1 | .000 | 1.858 | 1.574 | 2.193 |
| 55 years and older | 0b | . | . | 0 | . | . | . | . |
| Occupation | Self employed | -.558 | .173 | 10.432 | 1 | .001 | .573 | .408 | .803 |
| Employee | -.578 | .161 | 12.835 | 1 | .000 | .561 | .409 | .770 |
| Manual worker | -.234 | .183 | 1.636 | 1 | .201 | .791 | .553 | 1.133 |
| Without a professional activity | -.519 | .163 | 10.178 | 1 | .001 | .595 | .433 | .819 |
| Refusal | 0b | . | . | 0 | . | . | . | . |
| You actively avoid all news | Intercept | | -.315 | .666 | .224 | 1 | .636 |  |  |  |
| Type of community | Rural area or village | .509 | .103 | 24.286 | 1 | .000 | 1.664 | 1.359 | 2.037 |
| Small or middle-sized town | .298 | .095 | 9.920 | 1 | .002 | 1.348 | 1.119 | 1.622 |
| Large town | 0b | . | . | 0 | . | . | . | . |
| Region | Western Europe | -.438 | .110 | 15.904 | 1 | .000 | .645 | .520 | .800 |
| Southern Europe | -.238 | .104 | 5.267 | 1 | .022 | .788 | .643 | .966 |
| Northern Europe | -.711 | .111 | 40.997 | 1 | .000 | .491 | .395 | .610 |
| Eastern Europe | 0b | . | . | 0 | . | . | . | . |
| Age education | Up to 15 | -.262 | .312 | .703 | 1 | .402 | .770 | .417 | 1.420 |
| 16-19 | -.836 | .258 | 10.517 | 1 | .001 | .433 | .262 | .718 |
| 20 years and older | -1.349 | .257 | 27.476 | 1 | .000 | .259 | .157 | .430 |
| Still in full time education | -.991 | .281 | 12.481 | 1 | .000 | .371 | .214 | .643 |
| Never been in full time education | .066 | .321 | .042 | 1 | .837 | 1.068 | .570 | 2.004 |
| Don’t know | -.096 | .290 | .110 | 1 | .740 | .908 | .514 | 1.603 |
| Refusal | 0b | . | . | 0 | . | . | . | . |
| Gender | Male | -1.206 | .595 | 4.109 | 1 | .043 | .299 | .093 | .961 |
| Female | -.355 | .594 | .357 | 1 | .550 | .701 | .219 | 2.247 |
| In other way/Prefer not to say | 0b | . | . | 0 | . | . | . | . |
| Age | 15-24 years | 1.408 | .139 | 102.210 | 1 | .000 | 4.086 | 3.110 | 5.368 |
| 25-39 years | 1.111 | .117 | 90.627 | 1 | .000 | 3.036 | 2.416 | 3.816 |
| 40-54 years | .724 | .118 | 37.633 | 1 | .000 | 2.062 | 1.636 | 2.598 |
| 55 years and older | 0b | . | . | 0 | . | . | . | . |
| Occupation | Self employed | -.659 | .222 | 8.823 | 1 | .003 | .517 | .335 | .799 |
| Employee | -.724 | .205 | 12.493 | 1 | .000 | .485 | .325 | .724 |
| Manual worker | -.379 | .236 | 2.585 | 1 | .108 | .685 | .432 | 1.086 |
| [OCCUPATION OF RESPONDENT (SCALE)=4] | -.604 | .206 | 8.559 | 1 | .003 | .547 | .365 | .819 |
| [OCCUPATION OF RESPONDENT (SCALE)=999] | 0b | . | . | 0 | . | . | . | . |
| Don’t know | Intercept | | 1.217 | .559 | 4.731 | 1 | .030 |  |  |  |
| Type of community | Rural area or village | .242 | .126 | 3.725 | 1 | .054 | 1.274 | .996 | 1.630 |
| Small or middle-sized town | .193 | .112 | 2.957 | 1 | .086 | 1.213 | .973 | 1.513 |
| Large town | 0b | . | . | 0 | . | . | . | . |
| Region | Western Europe | -.065 | .133 | .243 | 1 | .622 | .937 | .722 | 1.215 |
| Southern Europe | -.264 | .138 | 3.677 | 1 | .055 | .768 | .587 | 1.006 |
| Northern Europe | -.362 | .132 | 7.467 | 1 | .006 | .696 | .537 | .903 |
| Eastern Europe | 0b | . | . | 0 | . | . | . | . |
| Age education | Up to 15 | -.704 | .313 | 5.056 | 1 | .025 | .495 | .268 | .914 |
| 16-19 | -1.480 | .242 | 37.554 | 1 | .000 | .228 | .142 | .365 |
| 20 years and older | -2.171 | .245 | 78.758 | 1 | .000 | .114 | .071 | .184 |
| Still in full time education | -1.483 | .266 | 31.063 | 1 | .000 | .227 | .135 | .382 |
| Never been in full time education | -.236 | .308 | .586 | 1 | .444 | .790 | .432 | 1.444 |
| Don’t know | -.021 | .263 | .006 | 1 | .937 | .979 | .585 | 1.639 |
| Refusal | 0b | . | . | 0 | . | . | . | . |
| Gender | Male | -1.928 | .488 | 15.627 | 1 | .000 | .145 | .056 | .378 |
| Female | -1.364 | .487 | 7.849 | 1 | .005 | .256 | .098 | .664 |
| In other way/Prefer not to say | 0b | . | . | 0 | . | . | . | . |
| Age | 15-24 years | 1.635 | .161 | 102.770 | 1 | .000 | 5.132 | 3.741 | 7.040 |
| 25-39 years | 1.119 | .147 | 57.794 | 1 | .000 | 3.061 | 2.294 | 4.084 |
| 40-54 years | 0.881 | .145 | 36.741 | 1 | .000 | 2.414 | 1.816 | 3.210 |
| 55 years and older | 0b | . | . | 0 | . | . | . | . |
| Occupation | Self employed | -1.386 | .217 | 40.832 | 1 | .000 | .250 | .164 | .383 |
| Employee | -1.554 | .191 | 65.990 | 1 | .000 | .211 | .145 | .307 |
| Manual worker | -1.118 | .232 | 23.191 | 1 | .000 | .327 | .207 | .515 |
| Without a professional activity | -1.169 | .191 | 37.550 | 1 | .000 | .311 | .214 | .452 |
| Refusal | 0b | . | . | 0 | . | . | . | . |
| **Model fitting information** | | | | | | | | | | |
| Model | Model Fitting Criteria | | | | Likelihood Ratio Tests | | | |  |  |
| AIC | BIC | -2 Log Likelihood | | Chi-Square | | df | p-value |  |  |
| Intercept Only | 21965.838 | 22006.655 | 21955.838 | |  | |  |  |  |  |
| Final | 18841.799 | 19698.962 | 18631.799 | | 324.0393 | | 100 | 0.000 |  |  |
| **Goodness-of-Fit** | | | | | | | | | | |
|  | Chi-Square | df | p-value |  |  |  |  |  |  |  |
| Pearson | 12925.130 | 11370 | 0.000 |  |  |  |  |  |  |  |
|  |  |  |  |  |  |  |  |  |  |  |
| **Pseudo R-Square** | | | | | | | | | | |
| Cox and Snell | 0.120 |  |  |  |  |  |  |  |  |  |
| Nagelkerke | 0.128 |  |  |  |  |  |  |  |  |  |
| McFadden | 0.046 |  |  |  |  |  |  |  |  |  |
| **Likelihood Ratio Tests** | | | | | | | | | | |
| Effect | Model Fitting Criteria | | | |  |  |  |  |  |  |
| AIC of Reduced Model | BIC of Reduced Model | -2 Log Likelihood of Reduced Model | | Chi-Square | | df | p-value | |  |
| Intercept | 18841.799 | 19698.962 | 18631.799a | | 0.000 | | 0 | . | |  |
| Type of community | 18871.286 | 19646.816 | 18681.286 | | 49.488 | | 10 | 0.000 | |  |
| European region | 18989.771 | 19724.483 | 18809.771 | | 177.972 | | 15 | 0.000 | |  |
| Age education (recoded 5 cat) | 19237.289 | 19849.549 | 19087.289 | | 455.491 | | 30 | 0.000 | |  |
| Gender | 19283.825 | 20059.354 | 19093.825 | | 462.026 | | 10 | 0.000 | |  |
| Age recoded - 4 categories | 20016.767 | 20751.479 | 19836.767 | | 1204.969 | | 15 | 0.000 | |  |
| Occupation of respondent (scale) | 18973.061 | 19666.956 | 18803.061 | | 171.263 | | 20 | 0.000 | |  |
| a. The reference category is: You actively search news several times a day. | | | | | | | | | | |
| b. This parameter is set to zero because it is redundant. | | | | | | | | | | |

Table A6: Parameter estimates for the second multinomial logistic regression

| Q2a. Among the following, what media have you used the most to access news in the past 7 days? | | | | | B | Std. Error | Wald | df | p-value | Exp(B) | 95% Confidence Interval for Exp(B) | |
| --- | --- | --- | --- | --- | --- | --- | --- | --- | --- | --- | --- | --- |
| Lower Bound | Upper Bound |
| Radio | Intercept | | | | 9.980 | 1.530 | 42.572 | 1 | .000 |  |  |  |
| Type of community | Rural area or village | | | -.166 | .202 | .675 | 1 | .411 | .847 | .570 | 1.258 |
| Small or middle-sized town | | | .279 | .203 | 1.876 | 1 | .171 | 1.321 | .887 | 1.969 |
| Large town | | | 0b | . | . | 0 | . | . | . | . |
| Region | Western Europe | | | -.224 | .222 | 1.024 | 1 | .312 | .799 | .517 | 1.234 |
| Southern Europe | | | .203 | .267 | .579 | 1 | .447 | 1.225 | .726 | 2.066 |
| Northern Europe | | | .143 | .242 | .349 | 1 | .555 | 1.154 | .718 | 1.854 |
| Eastern Europe | | | 0b | . | . | 0 | . | . | . | . |
| Age education | Up to 15 | | | .399 | .481 | .688 | 1 | .407 | 1.490 | .581 | 3.822 |
| 16-19 | | | .739 | .366 | 4.089 | 1 | .043 | 2.095 | 1.023 | 4.289 |
| 20 years and older | | | .399 | .361 | 1.223 | 1 | .269 | 1.491 | .734 | 3.027 |
| Still in full time education | | | .616 | .434 | 2.017 | 1 | .156 | 1.852 | .791 | 4.335 |
| Never been in full time education | | | .649 | .560 | 1.345 | 1 | .246 | 1.914 | .639 | 5.733 |
| Don’t know | | | .039 | .405 | .009 | 1 | .923 | 1.040 | .470 | 2.301 |
| Refusal | | | 0b | . | . | 0 | . | . | . | . |
| Gender | Male | | | 1.306 | .835 | 2.447 | 1 | .118 | 3.690 | .719 | 18.943 |
| Female | | | .917 | .832 | 1.214 | 1 | .271 | 2.501 | .490 | 12.776 |
| In other way/Prefer not to say | | | 0b | . | . | 0 | . | . | . | . |
| Age | 15-24 years | | | -1.042 | .288 | 13.075 | 1 | .000 | .353 | .201 | .621 |
| 25-39 years | | | -.766 | .243 | 9.961 | 1 | .002 | .465 | .289 | .748 |
| 40-54 years | | | -.368 | .242 | 2.310 | 1 | .129 | .692 | .431 | 1.112 |
| 55 years and older | | | 0b | . | . | 0 | . | . | . | . |
| Occupation | Self employed | | | .222 | .371 | .356 | 1 | .551 | 1.248 | .603 | 2.584 |
| Employee | | | .616 | .333 | 3.417 | 1 | .065 | 1.851 | .964 | 3.556 |
| Manual worker | | | .319 | .388 | .675 | 1 | .411 | 1.376 | .643 | 2.944 |
| Without a professional activity | | | .352 | .337 | 1.091 | 1 | .296 | 1.423 | .734 | 2.756 |
| Refusal | | | 0b | . | . | 0 | . | . | . | . |
| Mode of online news access | You directly go to the website or app of the news source, e.g. the website of a newspaper, a magazine, or a TV channel | Not mentioned | | -1.188 | .267 | 19.838 | 1 | .000 | .305 | .181 | .514 |
| Mentioned | | 0b | . | . | 0 | . | . | . | . |
| You use a news aggregator app or website, meaning a website or app that assembles information from different sources according to your preselected interests | Not mentioned | | -1.328 | .364 | 13.286 | 1 | .000 | .265 | .130 | .541 |
| Mentioned | | 0b | . | . | 0 | . | . | . | . |
| You read articles or posts that appear in your online social networks | Not mentioned | | -1.044 | .248 | 17.679 | 1 | .000 | .352 | .216 | .573 |
| Mentioned | | 0b | . | . | 0 | . | . | . | . |
| You read content shared by friends on direct messaging apps | Not mentioned | | -1.225 | .344 | 12.696 | 1 | .000 | .294 | .150 | .576 |
| Mentioned | | 0b | . | . | 0 | . | . | . | . |
| Via notifications from news apps you registered to or via alerts you receive | Not mentioned | | -1.165 | .381 | 9.361 | 1 | .002 | .312 | .148 | .658 |
| Mentioned | | 0b | . | . | 0 | . | . | . | . |
| Via email newsletter(s) you receive | Not mentioned | | -.387 | .324 | 1.427 | 1 | .232 | .679 | .360 | 1.281 |
| Mentioned | | 0b | . | . | 0 | . | . | . | . |
| News topics accessed | Local news | Not mentioned | | -.568 | .230 | 6.113 | 1 | .013 | .567 | .361 | .889 |
| Mentioned | | 0b | . | . | 0 | . | . | . | . |
| National politics | Not mentioned | | -.448 | .294 | 2.323 | 1 | .127 | .639 | .359 | 1.137 |
| Mentioned | | 0b | . | . | 0 | . | . | . | . |
| European and international affairs | Not mentioned | | -.296 | .267 | 1.227 | 1 | .268 | .744 | .441 | 1.255 |
| Mentioned | | 0b | . | . | 0 | . | . | . | . |
| Science and technology | Not mentioned | | -.022 | .287 | .006 | 1 | .939 | .978 | .557 | 1.718 |
| Mentioned | | 0b | . | . | 0 | . | . | . | . |
| Sport | Not mentioned | | -.425 | .242 | 3.080 | 1 | .079 | .654 | .407 | 1.051 |
| Mentioned | | 0b | . | . | 0 | . | . | . | . |
| Financial and economic news | Not mentioned | | -.451 | .323 | 1.947 | 1 | .163 | .637 | .338 | 1.200 |
| Mentioned | | 0b | . | . | 0 | . | . | . | . |
| Culture and art | Not mentioned | | .027 | .274 | .010 | 1 | .920 | 1.028 | .600 | 1.760 |
| Mentioned | | 0b | . | . | 0 | . | . | . | . |
| People (e.g. royals, celebrities, etc.) | Not mentioned | | -1.534 | .519 | 8.732 | 1 | .003 | .216 | .078 | .597 |
| Mentioned | | 0b | . | . | 0 | . | . | . | . |
| Hobbies, lifestyle | Not mentioned | | -.248 | .251 | .974 | 1 | .324 | .781 | .478 | 1.276 |
| Mentioned | | 0b | . | . | 0 | . | . | . | . |
| Crime, accidents | Not mentioned | | .333 | .235 | 2.006 | 1 | .157 | 1.394 | .880 | 2.209 |
| Mentioned | | 0b | . | . | 0 | . | . | . | . |
| Trusted news sources | Public TV and radio stations (incl. their online presence) | Not mentioned | | -.669 | .221 | 9.205 | 1 | .002 | .512 | .332 | .789 |
| Mentioned | | 0b | . | . | 0 | . | . | . | . |
| Private TV and radio stations (incl. their online presence) | Not mentioned | | -.945 | .324 | 8.523 | 1 | .004 | .389 | .206 | .733 |
| Mentioned | | 0b | . | . | 0 | . | . | . | . |
| The written press (such as newspapers or magazines), incl. their online presence | Not mentioned | | .053 | .245 | .048 | 1 | .827 | 1.055 | .653 | 1.703 |
| Mentioned | | 0b | . | . | 0 | . | . | . | . |
| Other online news platforms incl. blogs, podcasts | Not mentioned | | .170 | .321 | .280 | 1 | .596 | 1.185 | .632 | 2.222 |
| Mentioned | | 0b | . | . | 0 | . | . | . | . |
| YouTube or other video platforms | Not mentioned | | -.316 | .285 | 1.228 | 1 | .268 | .729 | .416 | 1.275 |
| Mentioned | | 0b | . | . | 0 | . | . | . | . |
| People, groups or friends I follow on social media or messaging platforms | Not mentioned | | -.203 | .281 | .522 | 1 | .470 | .816 | .470 | 1.417 |
| Mentioned | | 0b | . | . | 0 | . | . | . | . |
| Influencers on social media channels (e.g. YouTube, Instagram, TikTok etc.) | Not mentioned | | -.092 | .319 | .084 | 1 | .772 | .912 | .488 | 1.705 |
| Mentioned | | 0b | . | . | 0 | . | . | . | . |
| News consumption frequency | You actively search news several times a day | | | 1.165 | .374 | 9.691 | 1 | .002 | 3.205 | 1.539 | 6.673 |
| You follow the news on a daily basis | | | 1.813 | .329 | 30.420 | 1 | .000 | 6.129 | 3.218 | 11.674 |
| You follow the news from time to time | | | 1.358 | .289 | 22.078 | 1 | .000 | 3.887 | 2.206 | 6.847 |
| You are trying to avoid some news topics | | | .850 | .325 | 6.835 | 1 | .009 | 2.340 | 1.237 | 4.425 |
| You actively avoid all news | | | .347 | .284 | 1.497 | 1 | .221 | 1.415 | .811 | 2.468 |
|  |  | Don’t know | | | 0b | . | . | 0 | . | . | . | . |
| TV | Intercept | | | | 10.008 | 1.474 | 46.093 | 1 | .000 |  |  |  |
| Type of community | Rural area or village | | | -.285 | .198 | 2.068 | 1 | .150 | .752 | .510 | 1.109 |
| Small or middle-sized town | | | .239 | .200 | 1.419 | 1 | .234 | 1.270 | .857 | 1.881 |
| Large town | | | 0b | . | . | 0 | . | . | . | . |
| Region | Western Europe | | | -.823 | .217 | 14.365 | 1 | .000 | .439 | .287 | .672 |
| Southern Europe | | | .133 | .262 | .256 | 1 | .613 | 1.142 | .683 | 1.909 |
| Northern Europe | | | -.374 | .238 | 2.462 | 1 | .117 | .688 | .432 | 1.098 |
| Eastern Europe | | | 0b | . | . | 0 | . | . | . | . |
| Age education | Up to 15 | | | .648 | .464 | 1.955 | 1 | .162 | 1.912 | .771 | 4.745 |
| 16-19 | | | 1.038 | .351 | 8.757 | 1 | .003 | 2.822 | 1.420 | 5.611 |
| 20 years and older | | | .666 | .346 | 3.701 | 1 | .054 | 1.947 | .988 | 3.838 |
| Still in full time education | | | .908 | .417 | 4.740 | 1 | .029 | 2.480 | 1.095 | 5.619 |
| Never been in full time education | | | 1.089 | .539 | 4.087 | 1 | .043 | 2.970 | 1.034 | 8.535 |
| Don’t know | | | .341 | .385 | .785 | 1 | .376 | 1.407 | .661 | 2.993 |
| Refusal | | | 0b | . | . | 0 | . | . | . | . |
| Gender | Male | | | 1.155 | .756 | 2.335 | 1 | .126 | 3.174 | .722 | 13.957 |
| Female | | | .917 | .753 | 1.483 | 1 | .223 | 2.501 | .572 | 10.941 |
| In other way/Prefer not to say | | | 0b | . | . | 0 | . | . | . | . |
| Age | 15-24 years | | | -1.151 | .280 | 16.860 | 1 | .000 | .316 | .183 | .548 |
| 25-39 years | | | -.992 | .239 | 17.275 | 1 | .000 | .371 | .232 | .592 |
| 40-54 years | | | -.520 | .239 | 4.737 | 1 | .030 | .595 | .372 | .950 |
| 55 years and older | | | 0b | . | . | 0 | . | . | . | . |
| Occupation | Self employed | | | .151 | .358 | .178 | 1 | .673 | 1.163 | .577 | 2.345 |
| Employee | | | .504 | .320 | 2.482 | 1 | .115 | 1.656 | .884 | 3.102 |
| Manual worker | | | .237 | .374 | .402 | 1 | .526 | 1.268 | .609 | 2.641 |
| Without a professional activity | | | .616 | .324 | 3.609 | 1 | .057 | 1.851 | .981 | 3.493 |
| Refusal | | | 0b | . | . | 0 | . | . | . | . |
| Mode of online news access | You directly go to the website or app of the news source, e.g. the website of a newspaper, a magazine, or a TV channel | Not mentioned | | -.989 | .265 | 13.965 | 1 | .000 | .372 | .221 | .625 |
| Mentioned | | 0b | . | . | 0 | . | . | . | . |
| You use a news aggregator app or website, meaning a website or app that assembles information from different sources according to your preselected interests | Not mentioned | | -1.285 | .362 | 12.593 | 1 | .000 | .277 | .136 | .562 |
| Mentioned | | 0b | . | . | 0 | . | . | . | . |
| You read articles or posts that appear in your online social networks | Not mentioned | | -1.008 | .246 | 16.802 | 1 | .000 | .365 | .225 | .591 |
| Mentioned | | 0b | . | . | 0 | . | . | . | . |
| You read content shared by friends on direct messaging apps | Not mentioned | | -1.006 | .341 | 8.681 | 1 | .003 | .366 | .187 | .714 |
| Mentioned | | 0b | . | . | 0 | . | . | . | . |
| Via notifications from news apps you registered to or via alerts you receive | Not mentioned | | -1.153 | .379 | 9.268 | 1 | .002 | .316 | .150 | .663 |
| Mentioned | | 0b | . | . | 0 | . | . | . | . |
| Via email newsletter(s) you receive | Not mentioned | | -.128 | .321 | .160 | 1 | .689 | .879 | .469 | 1.649 |
| Mentioned | | 0b | . | . | 0 | . | . | . | . |
| News topics accessed | Local news | Not mentioned | | -.428 | .228 | 3.540 | 1 | .060 | .652 | .417 | 1.018 |
| Mentioned | | 0b | . | . | 0 | . | . | . | . |
| National politics | Not mentioned | | -.421 | .292 | 2.083 | 1 | .149 | .656 | .370 | 1.163 |
| Mentioned | | 0b | . | . | 0 | . | . | . | . |
| European and international affairs | Not mentioned | | -.258 | .265 | .953 | 1 | .329 | .772 | .460 | 1.298 |
| Mentioned | | 0b | . | . | 0 | . | . | . | . |
| Science and technology | Not mentioned | | .047 | .285 | .027 | 1 | .870 | 1.048 | .599 | 1.832 |
| Mentioned | | 0b | . | . | 0 | . | . | . | . |
| Sport | Not mentioned | | -.499 | .240 | 4.317 | 1 | .038 | .607 | .379 | .972 |
| Mentioned | | 0b | . | . | 0 | . | . | . | . |
| Financial and economic news | Not mentioned | | -.509 | .321 | 2.508 | 1 | .113 | .601 | .320 | 1.129 |
| Mentioned | | 0b | . | . | 0 | . | . | . | . |
| Culture and art | Not mentioned | | .212 | .272 | .607 | 1 | .436 | 1.236 | .725 | 2.107 |
| Mentioned | | 0b | . | . | 0 | . | . | . | . |
| People (e.g. royals, celebrities, etc.) | Not mentioned | | -1.545 | .517 | 8.913 | 1 | .003 | .213 | .077 | .588 |
| Mentioned | | 0b | . | . | 0 | . | . | . | . |
| Hobbies, lifestyle | Not mentioned | | -.168 | .248 | .456 | 1 | .499 | .846 | .520 | 1.376 |
| Mentioned | | 0b | . | . | 0 | . | . | . | . |
| Crime, accidents | Not mentioned | | .230 | .232 | .978 | 1 | .323 | 1.258 | .798 | 1.984 |
| Mentioned | | 0b | . | . | 0 | . | . | . | . |
| Trusted news sources | Public TV and radio stations (incl. their online presence) | Not mentioned | | -.681 | .218 | 9.736 | 1 | .002 | .506 | .330 | .776 |
| Mentioned | | 0b | . | . | 0 | . | . | . | . |
| Private TV and radio stations (incl. their online presence) | Not mentioned | | -.956 | .322 | 8.823 | 1 | .003 | .384 | .204 | .722 |
| Mentioned | | 0b | . | . | 0 | . | . | . | . |
| The written press (such as newspapers or magazines), incl. their online presence | Not mentioned | | .081 | .242 | .112 | 1 | .738 | 1.084 | .674 | 1.743 |
| Mentioned | | 0b | . | . | 0 | . | . | . | . |
| Other online news platforms incl. blogs, podcasts | Not mentioned | | .254 | .317 | .639 | 1 | .424 | 1.289 | .692 | 2.400 |
| Mentioned | | 0b | . | . | 0 | . | . | . | . |
| YouTube or other video platforms | Not mentioned | | -.245 | .282 | .754 | 1 | .385 | .783 | .451 | 1.360 |
| Mentioned | | 0b | . | . | 0 | . | . | . | . |
| People, groups or friends I follow on social media or messaging platforms | Not mentioned | | -.192 | .278 | .476 | 1 | .490 | .825 | .479 | 1.424 |
| Mentioned | | 0b | . | . | 0 | . | . | . | . |
| Influencers on social media channels (e.g. YouTube, Instagram, TikTok etc.) | Not mentioned | | -.102 | .314 | .106 | 1 | .744 | .903 | .488 | 1.671 |
| Mentioned | | 0b | . | . | 0 | . | . | . | . |
| News consumption frequency | You actively search news several times a day | | | 1.511 | .358 | 17.833 | 1 | .000 | 4.529 | 2.247 | 9.131 |
| 2.227 | .311 | 51.306 | 1 | .000 | 9.274 | 5.042 | 17.057 |
| You follow the news from time to time | | | 1.611 | .268 | 35.995 | 1 | .000 | 5.005 | 2.958 | 8.471 |
| You are trying to avoid some news topics | | | 1.069 | .303 | 12.476 | 1 | .000 | 2.912 | 1.609 | 5.269 |
| You actively avoid all news | | | -.039 | .257 | .023 | 1 | .881 | .962 | .581 | 1.592 |
| Don’t know | | | 0b | . | . | 0 | . | . | . | . |
| Written (printed) press (e.g. newspapers, weekly or monthly magazine, etc. | Intercept | | | | 9.637 | 1.576 | 37.399 | 1 | .000 |  |  |  |
| Type of community | Rural area or village | | | -.262 | .209 | 1.567 | 1 | .211 | .770 | .511 | 1.159 |
| Small or middle-sized town | | | .220 | .209 | 1.104 | 1 | .293 | 1.246 | .827 | 1.876 |
| Large town | | | 0b | . | . | 0 | . | . | . | . |
| Region | Western Europe | | | .228 | .234 | .953 | 1 | .329 | 1.256 | .795 | 1.986 |
| Southern Europe | | | .666 | .277 | 5.786 | 1 | .016 | 1.947 | 1.131 | 3.350 |
| Northern Europe | | | .332 | .254 | 1.711 | 1 | .191 | 1.394 | .847 | 2.293 |
| Eastern Europe | | | 0b | . | . | 0 | . | . | . | . |
| Age education | Up to 15 | | | .367 | .520 | .498 | 1 | .481 | 1.443 | .521 | 4.002 |
| 16-19 | | | .533 | .406 | 1.723 | 1 | .189 | 1.703 | .769 | 3.774 |
| 20 years and older | | | .363 | .401 | .821 | 1 | .365 | 1.438 | .655 | 3.155 |
| Still in full time education | | | .419 | .475 | .776 | 1 | .378 | 1.520 | .599 | 3.858 |
| Never been in full time education | | | .426 | .616 | .478 | 1 | .489 | 1.531 | .458 | 5.123 |
| Don’t know | | | .268 | .450 | .354 | 1 | .552 | 1.307 | .541 | 3.159 |
| Refusal | | | 0b | . | . | 0 | . | . | . | . |
| Gender | Male | | | .265 | .826 | .103 | 1 | .748 | 1.304 | .258 | 6.583 |
| Female | | | -.262 | .824 | .101 | 1 | .750 | .769 | .153 | 3.866 |
| In other way/Prefer not to say | | | 0b | . | . | 0 | . | . | . | . |
| Age | 15-24 years | | | -.929 | .302 | 9.500 | 1 | .002 | .395 | .219 | .713 |
| 25-39 years | | | -.829 | .251 | 10.940 | 1 | .001 | .436 | .267 | .713 |
| 40-54 years | | | -.807 | .250 | 10.383 | 1 | .001 | .446 | .273 | .729 |
| 55 years and older | | | 0b | . | . | 0 | . | . | . | . |
| Occupation | Self employed | | | .588 | .405 | 2.110 | 1 | .146 | 1.801 | .814 | 3.984 |
| Employee | | | .676 | .369 | 3.364 | 1 | .067 | 1.967 | .955 | 4.052 |
| Manual worker | | | .408 | .428 | .909 | 1 | .340 | 1.504 | .650 | 3.478 |
| Without a professional activity | | | .720 | .371 | 3.755 | 1 | .053 | 2.054 | .992 | 4.253 |
| Refusal | | | 0b | . | . | 0 | . | . | . | . |
| Mode of online news access | You directly go to the website or app of the news source, e.g. the website of a newspaper, a magazine, or a TV channel | Not mentioned | | -1.240 | .270 | 21.033 | 1 | .000 | .289 | .170 | .492 |
| Mentioned | | 0b | . | . | 0 | . | . | . | . |
| You use a news aggregator app or website, meaning a website or app that assembles information from different sources according to your preselected interests | Not mentioned | | -1.493 | .367 | 16.498 | 1 | .000 | .225 | .109 | .462 |
| Mentioned | | 0b | . | . | 0 | . | . | . | . |
| You read articles or posts that appear in your online social networks | Not mentioned | | -.922 | .253 | 13.241 | 1 | .000 | .398 | .242 | .654 |
| Mentioned | | 0b | . | . | 0 | . | . | . | . |
| You read content shared by friends on direct messaging apps | Not mentioned | | -1.165 | .350 | 11.095 | 1 | .001 | .312 | .157 | .619 |
| Mentioned | | 0b | . | . | 0 | . | . | . | . |
| Via notifications from news apps you registered to or via alerts you receive | Not mentioned | | -1.209 | .384 | 9.896 | 1 | .002 | .299 | .141 | .634 |
| Mentioned | | 0b | . | . | 0 | . | . | . | . |
| Via email newsletter(s) you receive | Not mentioned | | -.525 | .328 | 2.561 | 1 | .110 | .592 | .311 | 1.125 |
| Mentioned | | 0b | . | . | 0 | . | . | . | . |
| News topics accessed | Local news | Not mentioned | | -.526 | .234 | 5.044 | 1 | .025 | .591 | .373 | .935 |
| Mentioned | | 0b | . | . | 0 | . | . | . | . |
| National politics | Not mentioned | | -.420 | .298 | 1.996 | 1 | .158 | .657 | .367 | 1.177 |
| Mentioned | | 0b | . | . | 0 | . | . | . | . |
| European and international affairs | Not mentioned | | -.323 | .271 | 1.420 | 1 | .233 | .724 | .426 | 1.231 |
| Mentioned | | 0b | . | . | 0 | . | . | . | . |
| Science and technology | Not mentioned | | .040 | .291 | .019 | 1 | .891 | 1.041 | .588 | 1.842 |
| Mentioned | | 0b | . | . | 0 | . | . | . | . |
| Sport | Not mentioned | | -.382 | .246 | 2.403 | 1 | .121 | .683 | .421 | 1.106 |
| Mentioned | | 0b | . | . | 0 | . | . | . | . |
| Financial and economic news | Not mentioned | | -.514 | .327 | 2.475 | 1 | .116 | .598 | .315 | 1.135 |
| Mentioned | | 0b | . | . | 0 | . | . | . | . |
| Culture and art | Not mentioned | | -.014 | .278 | .003 | 1 | .959 | .986 | .571 | 1.701 |
| Mentioned | | 0b | . | . | 0 | . | . | . | . |
| People (e.g. royals, celebrities, etc.) | Not mentioned | | -1.712 | .522 | 10.766 | 1 | .001 | .181 | .065 | .502 |
| Mentioned | | 0b | . | . | 0 | . | . | . | . |
| Hobbies, lifestyle | Not mentioned | | -.259 | .256 | 1.019 | 1 | .313 | .772 | .467 | 1.276 |
| Mentioned | | 0b | . | . | 0 | . | . | . | . |
| Crime, accidents | Not mentioned | | .413 | .239 | 2.977 | 1 | .084 | 1.511 | .945 | 2.416 |
| Mentioned | | 0b | . | . | 0 | . | . | . | . |
| Trusted news sources | Public TV and radio stations (incl. their online presence) | Not mentioned | | -.281 | .225 | 1.557 | 1 | .212 | .755 | .486 | 1.174 |
| Mentioned | | 0b | . | . | 0 | . | . | . | . |
| Private TV and radio stations (incl. their online presence) | Not mentioned | | -.755 | .327 | 5.321 | 1 | .021 | .470 | .247 | .893 |
| Mentioned | | 0b | . | . | 0 | . | . | . | . |
| The written press (such as newspapers or magazines), incl. their online presence | Not mentioned | | -.820 | .248 | 10.905 | 1 | .001 | .440 | .271 | .716 |
| Mentioned | | 0b | . | . | 0 | . | . | . | . |
| Other online news platforms incl. blogs, podcasts | Not mentioned | | .177 | .328 | .292 | 1 | .589 | 1.194 | .628 | 2.269 |
| Mentioned | | 0b | . | . | 0 | . | . | . | . |
| YouTube or other video platforms | Not mentioned | | -.209 | .295 | .505 | 1 | .477 | .811 | .455 | 1.445 |
| Mentioned | | 0b | . | . | 0 | . | . | . | . |
| People, groups or friends I follow on social media or messaging platforms | Not mentioned | | -.175 | .289 | .369 | 1 | .543 | .839 | .477 | 1.478 |
| Mentioned | | 0b | . | . | 0 | . | . | . | . |
| Influencers on social media channels (e.g. YouTube, Instagram, TikTok etc.) | Not mentioned | | -.314 | .329 | .914 | 1 | .339 | .730 | .383 | 1.391 |
| Mentioned | | 0b | . | . | 0 | . | . | . | . |
| News consumption frequency | You actively search news several times a day | | | 2.338 | .475 | 24.173 | 1 | .000 | 10.358 | 4.079 | 26.305 |
| You follow the news on a daily basis | | | 2.760 | .440 | 39.287 | 1 | .000 | 15.792 | 6.663 | 37.427 |
| You follow the news from time to time | | | 1.915 | .414 | 21.353 | 1 | .000 | 6.787 | 3.013 | 15.292 |
| You are trying to avoid some news topics | | | 1.885 | .444 | 18.064 | 1 | .000 | 6.589 | 2.762 | 15.718 |
| You actively avoid all news | | | .568 | .457 | 1.545 | 1 | .214 | 1.765 | .721 | 4.321 |
| Don’t know | | | 0b | . | . | 0 | . | . | . | . |
| Online press and/or news platforms | Intercept | | | | 10.304 | 1.499 | 47.223 | 1 | .000 |  |  |  |
| Type of community | Rural area or village | | | -.380 | .201 | 3.583 | 1 | .058 | .684 | .462 | 1.014 |
| Small or middle-sized town | | | .069 | .202 | .117 | 1 | .732 | 1.072 | .721 | 1.593 |
| Large town | | | 0b | . | . | 0 | . | . | . | . |
| Region | Western Europe | | | -.763 | .221 | 11.922 | 1 | .001 | .466 | .302 | .719 |
| Southern Europe | | | .330 | .264 | 1.560 | 1 | .212 | 1.391 | .829 | 2.336 |
| Northern Europe | | | -.008 | .240 | .001 | 1 | .972 | .992 | .619 | 1.588 |
| Eastern Europe | | | 0b | . | . | 0 | . | . | . | . |
| Age education | Up to 15 | | | .213 | .487 | .191 | 1 | .662 | 1.237 | .476 | 3.217 |
| 16-19 | | | .804 | .369 | 4.748 | 1 | .029 | 2.234 | 1.084 | 4.603 |
| 20 years and older | | | .704 | .364 | 3.736 | 1 | .053 | 2.022 | .990 | 4.128 |
| Still in full time education | | | .886 | .434 | 4.169 | 1 | .041 | 2.427 | 1.036 | 5.683 |
| Never been in full time education | | | 1.086 | .557 | 3.802 | 1 | .051 | 2.962 | .994 | 8.825 |
| Don’t know | | | .245 | .407 | .361 | 1 | .548 | 1.277 | .575 | 2.837 |
| Refusal | | | 0b | . | . | 0 | . | . | . | . |
| Gender | Male | | | .730 | .775 | .887 | 1 | .346 | 2.075 | .454 | 9.475 |
| Female | | | .513 | .772 | .442 | 1 | .506 | 1.671 | .368 | 7.590 |
| In other way/Prefer not to say | | | 0b | . | . | 0 | . | . | . | . |
| Age | 15-24 years | | | -.528 | .285 | 3.441 | 1 | .064 | .590 | .337 | 1.030 |
| 25-39 years | | | -.538 | .241 | 4.962 | 1 | .026 | .584 | .364 | .937 |
| 40-54 years | | | -.243 | .241 | 1.018 | 1 | .313 | .784 | .489 | 1.258 |
| 55 years and older | | | 0b | . | . | 0 | . | . | . | . |
| Occupation | Self employed | | | .230 | .369 | .388 | 1 | .533 | 1.258 | .611 | 2.594 |
| Employee | | | .587 | .332 | 3.134 | 1 | .077 | 1.799 | .939 | 3.446 |
| Manual worker | | | .084 | .388 | .046 | 1 | .829 | 1.087 | .509 | 2.324 |
| Without a professional activity | | | .485 | .336 | 2.090 | 1 | .148 | 1.625 | .841 | 3.137 |
| Refusal | | | 0b | . | . | 0 | . | . | . | . |
| Mode of online news access | You directly go to the website or app of the news source, e.g. the website of a newspaper, a magazine, or a TV channel | | Not mentioned | -1.799 | .266 | 45.794 | 1 | .000 | .166 | .098 | .279 |
| Mentioned | 0b | . | . | 0 | . | . | . | . |
| You use a news aggregator app or website, meaning a website or app that assembles information from different sources according to your preselected interests | | Not mentioned | -1.523 | .363 | 17.590 | 1 | .000 | .218 | .107 | .444 |
| Mentioned | 0b | . | . | 0 | . | . | . | . |
| You read articles or posts that appear in your online social networks | | Not mentioned | -1.068 | .247 | 18.661 | 1 | .000 | .344 | .212 | .558 |
| Mentioned | 0b | . | . | 0 | . | . | . | . |
| You read content shared by friends on direct messaging apps | | Not mentioned | -.939 | .343 | 7.472 | 1 | .006 | .391 | .200 | .767 |
| Mentioned | 0b | . | . | 0 | . | . | . | . |
| Via notifications from news apps you registered to or via alerts you receive | | Not mentioned | -1.098 | .380 | 8.341 | 1 | .004 | .334 | .158 | .703 |
| Mentioned | 0b | . | . | 0 | . | . | . | . |
| Via email newsletter(s) you receive | | Not mentioned | -.079 | .324 | .060 | 1 | .807 | .924 | .490 | 1.742 |
| Mentioned | 0b | . | . | 0 | . | . | . | . |
| News topics accessed | Local news | | Not mentioned | -.562 | .229 | 6.027 | 1 | .014 | .570 | .364 | .893 |
| Mentioned | 0b | . | . | 0 | . | . | . | . |
| National politics | | Not mentioned | -.527 | .293 | 3.237 | 1 | .072 | .590 | .332 | 1.048 |
| Mentioned | 0b | . | . | 0 | . | . | . | . |
| European and international affairs | | Not mentioned | -.600 | .266 | 5.083 | 1 | .024 | .549 | .326 | .925 |
| Mentioned | 0b | . | . | 0 | . | . | . | . |
| Science and technology | | Not mentioned | -.163 | .286 | .324 | 1 | .569 | .850 | .485 | 1.489 |
| Mentioned | 0b | . | . | 0 | . | . | . | . |
| Sport | | Not mentioned | -.351 | .241 | 2.111 | 1 | .146 | .704 | .439 | 1.130 |
| Mentioned | 0b | . | . | 0 | . | . | . | . |
| Financial and economic news | | Not mentioned | -.636 | .322 | 3.895 | 1 | .048 | .529 | .281 | .996 |
| Mentioned | 0b | . | . | 0 | . | . | . | . |
| Culture and art | | Not mentioned | .122 | .273 | .198 | 1 | .656 | 1.129 | .661 | 1.930 |
| Mentioned | 0b | . | . | 0 | . | . | . | . |
| People (e.g. royals, celebrities, etc.) | | Not mentioned | -1.540 | .518 | 8.831 | 1 | .003 | .214 | .078 | .592 |
| Mentioned | 0b | . | . | 0 | . | . | . | . |
| Hobbies, lifestyle | | Not mentioned | -.274 | .250 | 1.205 | 1 | .272 | .760 | .466 | 1.240 |
| Mentioned | 0b | . | . | 0 | . | . | . | . |
| Crime, accidents | | Not mentioned | .168 | .234 | .518 | 1 | .472 | 1.183 | .748 | 1.870 |
| Mentioned | 0b | . | . | 0 | . | . | . | . |
| Trusted news sources | Public TV and radio stations (incl. their online presence) | | Not mentioned | -.225 | .220 | 1.053 | 1 | .305 | .798 | .519 | 1.228 |
| Mentioned | 0b | . | . | 0 | . | . | . | . |
| Private TV and radio stations (incl. their online presence) | | Not mentioned | -.757 | .323 | 5.485 | 1 | .019 | .469 | .249 | .884 |
| Mentioned | 0b | . | . | 0 | . | . | . | . |
| The written press (such as newspapers or magazines), incl. their online presence | | Not mentioned | -.086 | .244 | .126 | 1 | .723 | .917 | .569 | 1.478 |
| Mentioned | 0b | . | . | 0 | . | . | . | . |
| Other online news platforms incl. blogs, podcasts | | Not mentioned | -.100 | .318 | .098 | 1 | .754 | .905 | .485 | 1.688 |
| Mentioned | 0b | . | . | 0 | . | . | . | . |
| YouTube or other video platforms | | Not mentioned | -.278 | .284 | .960 | 1 | .327 | .757 | .434 | 1.321 |
| Mentioned | 0b | . | . | 0 | . | . | . | . |
| People, groups or friends I follow on social media or messaging platforms | | Not mentioned | -.210 | .280 | .565 | 1 | .452 | .810 | .468 | 1.403 |
| Mentioned | 0b | . | . | 0 | . | . | . | . |
| Influencers on social media channels (e.g. YouTube, Instagram, TikTok etc.) | | Not mentioned | .098 | .318 | .094 | 1 | .759 | 1.103 | .591 | 2.056 |
| Mentioned | 0b | . | . | 0 | . | . | . | . |
| News consumption frequency | You actively search news several times a day | | | 1.939 | .386 | 25.241 | 1 | .000 | 6.949 | 3.262 | 14.803 |
| You follow the news on a daily basis | | | 2.337 | .343 | 46.388 | 1 | .000 | 10.349 | 5.282 | 20.274 |
| You follow the news from time to time | | | 1.823 | .305 | 35.688 | 1 | .000 | 6.191 | 3.404 | 11.260 |
| You are trying to avoid some news topics | | | 1.331 | .339 | 15.443 | 1 | .000 | 3.784 | 1.948 | 7.348 |
| You actively avoid all news | | | .161 | .316 | .260 | 1 | .610 | 1.175 | .632 | 2.183 |
| Don’t know | | | 0b | . | . | 0 | . | . | . | . |
| Video platforms (e.g. YouTube, etc.) | Intercept | | | | 10.338 | 1.578 | 42.902 | 1 | .000 |  |  |  |
| Type of community | Rural area or village | | | -.340 | .208 | 2.670 | 1 | .102 | .712 | .473 | 1.070 |
| Small or middle-sized town | | | .263 | .207 | 1.611 | 1 | .204 | 1.301 | .867 | 1.953 |
| Large town | | | 0b | . | . | 0 | . | . | . | . |
| Region | Western Europe | | | -.654 | .229 | 8.174 | 1 | .004 | .520 | .332 | .814 |
| Southern Europe | | | .258 | .270 | .915 | 1 | .339 | 1.295 | .763 | 2.198 |
| Northern Europe | | | -.002 | .246 | .000 | 1 | .992 | .998 | .616 | 1.616 |
| Eastern Europe | | | 0b | . | . | 0 | . | . | . | . |
| Age education | Up to 15 | | | .950 | .536 | 3.138 | 1 | .076 | 2.585 | .904 | 7.393 |
| 16-19 | | | 1.158 | .421 | 7.563 | 1 | .006 | 3.184 | 1.395 | 7.268 |
| 20 years and older | | | .965 | .417 | 5.364 | 1 | .021 | 2.626 | 1.160 | 5.945 |
| Still in full time education | | | 1.230 | .478 | 6.608 | 1 | .010 | 3.421 | 1.339 | 8.738 |
| Never been in full time education | | | 1.349 | .602 | 5.029 | 1 | .025 | 3.855 | 1.185 | 12.540 |
| Don’t know | | | .676 | .462 | 2.142 | 1 | .143 | 1.965 | .795 | 4.857 |
| Refusal | | | 0b | . | . | 0 | . | . | . | . |
| Gender | Male | | | 1.405 | .875 | 2.577 | 1 | .108 | 4.075 | .733 | 22.650 |
| Female | | | .848 | .873 | .945 | 1 | .331 | 2.336 | .422 | 12.926 |
| In other way/Prefer not to say | | | 0b | . | . | 0 | . | . | . | . |
| Age | 15-24 years | | | .474 | .292 | 2.645 | 1 | .104 | 1.607 | .907 | 2.847 |
| 25-39 years | | | .107 | .250 | .182 | 1 | .670 | 1.113 | .681 | 1.817 |
| 40-54 years | | | -.022 | .252 | .008 | 1 | .930 | .978 | .597 | 1.602 |
| 55 years and older | | | 0b | . | . | 0 | . | . | . | . |
| Occupation | Self employed | | | .083 | .386 | .047 | 1 | .829 | 1.087 | .510 | 2.317 |
| Employee | | | .374 | .349 | 1.152 | 1 | .283 | 1.454 | .734 | 2.881 |
| Manual worker | | | -.002 | .406 | .000 | 1 | .997 | .998 | .451 | 2.211 |
| Without a professional activity | | | .330 | .353 | .874 | 1 | .350 | 1.391 | .696 | 2.780 |
| Refusal | | | 0b | . | . | 0 | . | . | . | . |
| Mode of online news access | You directly go to the website or app of the news source, e.g. the website of a newspaper, a magazine, or a TV channel | | Not mentioned | -1.248 | .270 | 21.406 | 1 | .000 | .287 | .169 | .487 |
| Mentioned | 0b | . | . | 0 | . | . | . | . |
| You use a news aggregator app or website, meaning a website or app that assembles information from different sources according to your preselected interests | | Not mentioned | -1.593 | .366 | 18.943 | 1 | .000 | .203 | .099 | .417 |
| Mentioned | 0b | . | . | 0 | . | . | . | . |
| You read articles or posts that appear in your online social networks | | Not mentioned | -1.365 | .251 | 29.655 | 1 | .000 | .255 | .156 | .417 |
| Mentioned | 0b | . | . | 0 | . | . | . | . |
| You read content shared by friends on direct messaging apps | | Not mentioned | -1.323 | .345 | 14.684 | 1 | .000 | .266 | .135 | .524 |
| Mentioned | 0b | . | . | 0 | . | . | . | . |
| Via notifications from news apps you registered to or via alerts you receive | | Not mentioned | -1.332 | .383 | 12.094 | 1 | .001 | .264 | .125 | .559 |
| Mentioned | 0b | . | . | 0 | . | . | . | . |
| Via email newsletter(s) you receive | | Not mentioned | -.126 | .331 | .145 | 1 | .703 | .882 | .461 | 1.687 |
| Mentioned | 0b | . | . | 0 | . | . | . | . |
| News topics accessed | Local news | | Not mentioned | -.357 | .233 | 2.341 | 1 | .126 | .700 | .443 | 1.106 |
| Mentioned | 0b | . | . | 0 | . | . | . | . |
| National politics | | Not mentioned | -.409 | .297 | 1.896 | 1 | .169 | .664 | .371 | 1.189 |
| Mentioned | 0b | . | . | 0 | . | . | . | . |
| European and international affairs | | Not mentioned | -.525 | .270 | 3.770 | 1 | .052 | .592 | .348 | 1.005 |
| Mentioned | 0b | . | . | 0 | . | . | . | . |
| Science and technology | | Not mentioned | -.326 | .290 | 1.269 | 1 | .260 | .722 | .409 | 1.273 |
| Mentioned | 0b | . | . | 0 | . | . | . | . |
| Sport | | Not mentioned | -.236 | .245 | .921 | 1 | .337 | .790 | .488 | 1.278 |
| Mentioned | 0b | . | . | 0 | . | . | . | . |
| Financial and economic news | | Not mentioned | -.571 | .326 | 3.068 | 1 | .080 | .565 | .298 | 1.070 |
| Mentioned | 0b | . | . | 0 | . | . | . | . |
| Culture and art | | Not mentioned | .032 | .277 | .013 | 1 | .908 | 1.032 | .599 | 1.778 |
| Mentioned | 0b | . | . | 0 | . | . | . | . |
| People (e.g. royals, celebrities, etc.) | | Not mentioned | -1.568 | .521 | 9.068 | 1 | .003 | .208 | .075 | .578 |
| Mentioned | 0b | . | . | 0 | . | . | . | . |
| Hobbies, lifestyle | | Not mentioned | -.396 | .253 | 2.446 | 1 | .118 | .673 | .410 | 1.106 |
| Mentioned | 0b | . | . | 0 | . | . | . | . |
| Crime, accidents | | Not mentioned | .240 | .238 | 1.015 | 1 | .314 | 1.271 | .797 | 2.026 |
| Mentioned | 0b | . | . | 0 | . | . | . | . |
| Trusted news sources | Public TV and radio stations (incl. their online presence) | | Not mentioned | -.318 | .225 | 2.004 | 1 | .157 | .728 | .469 | 1.130 |
| Mentioned | 0b | . | . | 0 | . | . | . | . |
| Private TV and radio stations (incl. their online presence) | | Not mentioned | -.747 | .327 | 5.219 | 1 | .022 | .474 | .250 | .899 |
| Mentioned | 0b | . | . | 0 | . | . | . | . |
| The written press (such as newspapers or magazines), incl. their online presence | | Not mentioned | .223 | .249 | .805 | 1 | .370 | 1.250 | .768 | 2.036 |
| Mentioned | 0b | . | . | 0 | . | . | . | . |
| Other online news platforms incl. blogs, podcasts | | Not mentioned | -.207 | .322 | .414 | 1 | .520 | .813 | .433 | 1.527 |
| Mentioned | 0b | . | . | 0 | . | . | . | . |
| YouTube or other video platforms | | Not mentioned | -1.257 | .285 | 19.451 | 1 | .000 | .285 | .163 | .497 |
| Mentioned | 0b | . | . | 0 | . | . | . | . |
| People, groups or friends I follow on social media or messaging platforms | | Not mentioned | -.465 | .283 | 2.705 | 1 | .100 | .628 | .361 | 1.093 |
| Mentioned | 0b | . | . | 0 | . | . | . | . |
| Influencers on social media channels (e.g. YouTube, Instagram, TikTok etc.) | | Not mentioned | -.418 | .319 | 1.720 | 1 | .190 | .659 | .353 | 1.229 |
| Mentioned | 0b | . | . | 0 | . | . | . | . |
| News consumption frequency | You actively search news several times a day | | | 1.455 | .401 | 13.145 | 1 | .000 | 4.283 | 1.951 | 9.404 |
| You follow the news on a daily basis | | | 1.846 | .359 | 26.370 | 1 | .000 | 6.335 | 3.131 | 12.816 |
| You follow the news from time to time | | | 1.565 | .322 | 23.667 | 1 | .000 | 4.782 | 2.546 | 8.983 |
| You are trying to avoid some news topics | | | 1.207 | .355 | 11.559 | 1 | .001 | 3.345 | 1.668 | 6.709 |
| You actively avoid all news | | | .287 | .333 | .742 | 1 | .389 | 1.332 | .694 | 2.559 |
| Don’t know | | | 0b | . | . | 0 | . | . | . | . |
| Podcasts | Intercept | | | | 10.079 | 1.721 | 34.285 | 1 | .000 |  |  |  |
| Type of community | Rural area or village | | | -.367 | .226 | 2.630 | 1 | .105 | .693 | .445 | 1.080 |
| Small or middle-sized town | | | .004 | .222 | .000 | 1 | .986 | 1.004 | .649 | 1.552 |
| Large town | | | 0b | . | . | 0 | . | . | . | . |
| Region | Western Europe | | | -1.113 | .251 | 19.609 | 1 | .000 | .328 | .201 | .538 |
| Southern Europe | | | -.372 | .289 | 1.657 | 1 | .198 | .690 | .392 | 1.214 |
| Northern Europe | | | -.330 | .261 | 1.605 | 1 | .205 | .719 | .431 | 1.198 |
| Eastern Europe | | | 0b | . | . | 0 | . | . | . | . |
| Age education | Up to 15 | | | .497 | .636 | .611 | 1 | .434 | 1.644 | .472 | 5.723 |
| 16-19 | | | .688 | .500 | 1.889 | 1 | .169 | 1.989 | .746 | 5.301 |
| 20 years and older | | | .514 | .495 | 1.079 | 1 | .299 | 1.672 | .634 | 4.411 |
| Still in full time education | | | .901 | .552 | 2.660 | 1 | .103 | 2.462 | .834 | 7.271 |
| Never been in full time education | | | .902 | .693 | 1.695 | 1 | .193 | 2.465 | .634 | 9.585 |
| Don’t know | | | .515 | .548 | .883 | 1 | .347 | 1.673 | .572 | 4.898 |
| Refusal | | | 0b | . | . | 0 | . | . | . | . |
| Gender | Male | | | 1.007 | 1.007 | 1.000 | 1 | .317 | 2.737 | .380 | 19.689 |
| Female | | | .465 | 1.005 | .214 | 1 | .643 | 1.593 | .222 | 11.415 |
| In other way/Prefer not to say | | | 0b | . | . | 0 | . | . | . | . |
| Age | 15-24 years | | | .831 | .322 | 6.667 | 1 | .010 | 2.295 | 1.222 | 4.311 |
| 25-39 years | | | .411 | .278 | 2.184 | 1 | .139 | 1.508 | .874 | 2.601 |
| 40-54 years | | | .195 | .282 | .479 | 1 | .489 | 1.216 | .699 | 2.113 |
| 55 years and older | | | 0b | . | . | 0 | . | . | . | . |
| Occupation | Self employed | | | .406 | .473 | .736 | 1 | .391 | 1.501 | .594 | 3.795 |
| Employee | | | .874 | .436 | 4.029 | 1 | .045 | 2.397 | 1.021 | 5.629 |
| Manual worker | | | .760 | .488 | 2.431 | 1 | .119 | 2.139 | .822 | 5.563 |
| Without a professional activity | | | .472 | .444 | 1.133 | 1 | .287 | 1.604 | .672 | 3.827 |
| Refusal | | | 0b | . | . | 0 | . | . | . | . |
| Mode of online news access | You directly go to the website or app of the news source, e.g. the website of a newspaper, a magazine, or a TV channel | | Not mentioned | -1.231 | .281 | 19.202 | 1 | .000 | .292 | .168 | .506 |
| Mentioned | 0b | . | . | 0 | . | . | . | . |
| You use a news aggregator app or website, meaning a website or app that assembles information from different sources according to your preselected interests | | Not mentioned | -1.509 | .376 | 16.152 | 1 | .000 | .221 | .106 | .461 |
| Mentioned | 0b | . | . | 0 | . | . | . | . |
| You read articles or posts that appear in your online social networks | | Not mentioned | -1.386 | .262 | 28.069 | 1 | .000 | .250 | .150 | .418 |
| Mentioned | 0b | . | . | 0 | . | . | . | . |
| You read content shared by friends on direct messaging apps | | Not mentioned | -1.214 | .357 | 11.591 | 1 | .001 | .297 | .148 | .597 |
| Mentioned | 0b | . | . | 0 | . | . | . | . |
| Via notifications from news apps you registered to or via alerts you receive | | Not mentioned | -1.421 | .392 | 13.114 | 1 | .000 | .242 | .112 | .521 |
| Mentioned | 0b | . | . | 0 | . | . | . | . |
| Via email newsletter(s) you receive | | Not mentioned | -.738 | .342 | 4.670 | 1 | .031 | .478 | .245 | .934 |
| Mentioned | 0b | . | . | 0 | . | . | . | . |
| News topics accessed | Local news | | Not mentioned | -.174 | .246 | .498 | 1 | .480 | .840 | .519 | 1.362 |
| Mentioned | 0b | . | . | 0 | . | . | . | . |
| National politics | | Not mentioned | -.454 | .308 | 2.174 | 1 | .140 | .635 | .347 | 1.161 |
| Mentioned | 0b | . | . | 0 | . | . | . | . |
| European and international affairs | | Not mentioned | -.334 | .282 | 1.402 | 1 | .236 | .716 | .412 | 1.245 |
| Mentioned | 0b | . | . | 0 | . | . | . | . |
| Science and technology | | Not mentioned | -.267 | .300 | .793 | 1 | .373 | .765 | .425 | 1.379 |
| Mentioned | 0b | . | . | 0 | . | . | . | . |
| Sport | | Not mentioned | -.419 | .257 | 2.667 | 1 | .102 | .658 | .398 | 1.087 |
| Mentioned | 0b | . | . | 0 | . | . | . | . |
| Financial and economic news | | Not mentioned | -.461 | .336 | 1.884 | 1 | .170 | .630 | .326 | 1.218 |
| Mentioned | 0b | . | . | 0 | . | . | . | . |
| Culture and art | | Not mentioned | -.029 | .290 | .010 | 1 | .920 | .971 | .551 | 1.714 |
| Mentioned | 0b | . | . | 0 | . | . | . | . |
| People (e.g. royals, celebrities, etc.) | | Not mentioned | -1.771 | .527 | 11.276 | 1 | .001 | .170 | .061 | .479 |
| Mentioned | 0b | . | . | 0 | . | . | . | . |
| Hobbies, lifestyle | | Not mentioned | -.303 | .266 | 1.302 | 1 | .254 | .739 | .439 | 1.243 |
| Mentioned | 0b | . | . | 0 | . | . | . | . |
| Crime, accidents | | Not mentioned | .523 | .252 | 4.292 | 1 | .038 | 1.687 | 1.029 | 2.766 |
| Mentioned | 0b | . | . | 0 | . | . | . | . |
| Trusted news sources | Public TV and radio stations (incl. their online presence) | | Not mentioned | -.215 | .238 | .816 | 1 | .366 | .806 | .506 | 1.286 |
| Mentioned | 0b | . | . | 0 | . | . | . | . |
| Private TV and radio stations (incl. their online presence) | | Not mentioned | -.967 | .336 | 8.278 | 1 | .004 | .380 | .197 | .735 |
| Mentioned | 0b | . | . | 0 | . | . | . | . |
| The written press (such as newspapers or magazines), incl. their online presence | | Not mentioned | -.039 | .261 | .022 | 1 | .883 | .962 | .577 | 1.605 |
| Mentioned | 0b | . | . | 0 | . | . | . | . |
| Other online news platforms incl. blogs, podcasts | | Not mentioned | -.493 | .331 | 2.212 | 1 | .137 | .611 | .319 | 1.169 |
| Mentioned | 0b | . | . | 0 | . | . | . | . |
| YouTube or other video platforms | | Not mentioned | -.509 | .300 | 2.878 | 1 | .090 | .601 | .334 | 1.082 |
| Mentioned | 0b | . | . | 0 | . | . | . | . |
| People, groups or friends I follow on social media or messaging platforms | | Not mentioned | -.340 | .296 | 1.323 | 1 | .250 | .711 | .398 | 1.271 |
| Mentioned | 0b | . | . | 0 | . | . | . | . |
| Influencers on social media channels (e.g. YouTube, Instagram, TikTok etc.) | | Not mentioned | -.577 | .331 | 3.044 | 1 | .081 | .561 | .293 | 1.074 |
| Mentioned | 0b | . | . | 0 | . | . | . | . |
| News consumption frequency | You actively search news several times a day | | | 1.555 | .469 | 10.983 | 1 | .001 | 4.737 | 1.888 | 11.885 |
| You follow the news on a daily basis | | | 1.943 | .432 | 20.243 | 1 | .000 | 6.983 | 2.995 | 16.283 |
| You follow the news from time to time | | | 1.405 | .401 | 12.273 | 1 | .000 | 4.075 | 1.857 | 8.943 |
| You are trying to avoid some news topics | | | .765 | .446 | 2.938 | 1 | .087 | 2.148 | .896 | 5.150 |
| You actively avoid all news | | | .358 | .436 | .675 | 1 | .411 | 1.431 | .608 | 3.366 |
| Don’t know | | | 0b | . | . | 0 | . | . | . | . |
| Social media platforms (e.g. Facebook, Instagram, etc.) | Intercept | | | | 10.432 | 1.512 | 47.594 | 1 | .000 |  |  |  |
| Type of community | Rural area or village | | | -.296 | .200 | 2.192 | 1 | .139 | .744 | .502 | 1.101 |
| Small or middle-sized town | | | .201 | .202 | .990 | 1 | .320 | 1.223 | .823 | 1.816 |
| Large town | | | 0b | . | . | 0 | . | . | . | . |
| Region | Western Europe | | | -.759 | .220 | 11.920 | 1 | .001 | .468 | .304 | .720 |
| Southern Europe | | | .211 | .264 | .640 | 1 | .424 | 1.235 | .737 | 2.071 |
| Northern Europe | | | -.076 | .240 | .101 | 1 | .751 | .927 | .579 | 1.482 |
| Eastern Europe | | | 0b | . | . | 0 | . | . | . | . |
| Age education | Up to 15 | | | .370 | .474 | .609 | 1 | .435 | 1.447 | .572 | 3.662 |
| 16-19 | | | .736 | .357 | 4.243 | 1 | .039 | 2.087 | 1.036 | 4.203 |
| 20 years and older | | | .373 | .353 | 1.118 | 1 | .290 | 1.452 | .727 | 2.900 |
| Still in full time education | | | .819 | .422 | 3.772 | 1 | .052 | 2.269 | .993 | 5.186 |
| Never been in full time education | | | .945 | .545 | 3.011 | 1 | .083 | 2.572 | .885 | 7.478 |
| Don’t know | | | .104 | .394 | .069 | 1 | .793 | 1.109 | .513 | 2.400 |
| Refusal | | | 0b | . | . | 0 | . | . | . | . |
| Gender | Male | | | 1.626 | .816 | 3.971 | 1 | .046 | 5.086 | 1.027 | 25.186 |
| Female | | | 1.477 | .814 | 3.295 | 1 | .069 | 4.379 | .889 | 21.572 |
| In other way/Prefer not to say | | | 0b | . | . | 0 | . | . | . | . |
| Age | 15-24 years | | | .043 | .282 | .024 | 1 | .878 | 1.044 | .601 | 1.815 |
| 25-39 years | | | -.048 | .241 | .040 | 1 | .842 | .953 | .594 | 1.529 |
| 40-54 years | | | -.031 | .242 | .016 | 1 | .899 | .970 | .604 | 1.558 |
| 55 years and older | | | 0b | . | . | 0 | . | . | . | . |
| Occupation | Self employed | | | .071 | .362 | .038 | 1 | .846 | 1.073 | .528 | 2.183 |
| Employee | | | .387 | .324 | 1.421 | 1 | .233 | 1.472 | .779 | 2.780 |
| Manual worker | | | -.039 | .380 | .010 | 1 | .918 | .962 | .457 | 2.025 |
| Without a professional activity | | | .372 | .329 | 1.280 | 1 | .258 | 1.450 | .762 | 2.762 |
| Refusal | | | 0b | . | . | 0 | . | . | . | . |
| Mode of online news access | You directly go to the website or app of the news source, e.g. the website of a newspaper, a magazine, or a TV channel | | Not mentioned | -1.135 | .266 | 18.218 | 1 | .000 | .322 | .191 | .541 |
| Mentioned | 0b | . | . | 0 | . | . | . | . |
| You use a news aggregator app or website, meaning a website or app that assembles information from different sources according to your preselected interests | | Not mentioned | -1.326 | .363 | 13.329 | 1 | .000 | .265 | .130 | .541 |
| Mentioned | 0b | . | . | 0 | . | . | . | . |
| You read articles or posts that appear in your online social networks | | Not mentioned | -1.711 | .246 | 48.182 | 1 | .000 | .181 | .111 | .293 |
| Mentioned | 0b | . | . | 0 | . | . | . | . |
| You read content shared by friends on direct messaging apps | | Not mentioned | -1.256 | .342 | 13.499 | 1 | .000 | .285 | .146 | .557 |
| Mentioned | 0b | . | . | 0 | . | . | . | . |
| Via notifications from news apps you registered to or via alerts you receive | | Not mentioned | -1.175 | .380 | 9.566 | 1 | .002 | .309 | .147 | .650 |
| Mentioned | 0b | . | . | 0 | . | . | . | . |
| Via email newsletter(s) you receive | | Not mentioned | -.149 | .323 | .213 | 1 | .644 | .861 | .457 | 1.623 |
| Mentioned | 0b | . | . | 0 | . | . | . | . |
| News topics accessed | Local news | | Not mentioned | -.485 | .229 | 4.493 | 1 | .034 | .616 | .393 | .964 |
| Mentioned | 0b | . | . | 0 | . | . | . | . |
| National politics | | Not mentioned | -.401 | .293 | 1.876 | 1 | .171 | .669 | .377 | 1.189 |
| Mentioned | 0b | . | . | 0 | . | . | . | . |
| European and international affairs | | Not mentioned | -.327 | .266 | 1.514 | 1 | .218 | .721 | .428 | 1.214 |
| Mentioned | 0b | . | . | 0 | . | . | . | . |
| Science and technology | | Not mentioned | -.046 | .286 | .025 | 1 | .874 | .955 | .545 | 1.674 |
| Mentioned | 0b | . | . | 0 | . | . | . | . |
| Sport | | Not mentioned | -.365 | .241 | 2.289 | 1 | .130 | .694 | .432 | 1.114 |
| Mentioned | 0b | . | . | 0 | . | . | . | . |
| Financial and economic news | | Not mentioned | -.431 | .323 | 1.787 | 1 | .181 | .650 | .345 | 1.223 |
| Mentioned | 0b | . | . | 0 | . | . | . | . |
| Culture and art | | Not mentioned | .090 | .273 | .109 | 1 | .742 | 1.094 | .641 | 1.869 |
| Mentioned | 0b | . | . | 0 | . | . | . | . |
| People (e.g. royals, celebrities, etc.) | | Not mentioned | -1.591 | .518 | 9.435 | 1 | .002 | .204 | .074 | .562 |
| Mentioned | 0b | . | . | 0 | . | . | . | . |
| Hobbies, lifestyle | | Not mentioned | -.316 | .249 | 1.608 | 1 | .205 | .729 | .448 | 1.188 |
| Mentioned | 0b | . | . | 0 | . | . | . | . |
| Crime, accidents | | Not mentioned | .077 | .233 | .108 | 1 | .743 | 1.080 | .683 | 1.705 |
| Mentioned | 0b | . | . | 0 | . | . | . | . |
| Trusted news sources | Public TV and radio stations (incl. their online presence) | | Not mentioned | -.298 | .220 | 1.836 | 1 | .175 | .743 | .483 | 1.142 |
| Mentioned | 0b | . | . | 0 | . | . | . | . |
| Private TV and radio stations (incl. their online presence) | | Not mentioned | -.766 | .323 | 5.623 | 1 | .018 | .465 | .247 | .876 |
| Mentioned | 0b | . | . | 0 | . | . | . | . |
| The written press (such as newspapers or magazines), incl. their online presence | | Not mentioned | .122 | .244 | .251 | 1 | .616 | 1.130 | .701 | 1.822 |
| Mentioned | 0b | . | . | 0 | . | . | . | . |
| Other online news platforms incl. blogs, podcasts | | Not mentioned | -.122 | .318 | .148 | 1 | .700 | .885 | .475 | 1.649 |
| Mentioned | 0b | . | . | 0 | . | . | . | . |
| YouTube or other video platforms | | Not mentioned | -.467 | .283 | 2.732 | 1 | .098 | .627 | .360 | 1.091 |
| Mentioned | 0b | . | . | 0 | . | . | . | . |
| People, groups or friends I follow on social media or messaging platforms | | Not mentioned | -.601 | .278 | 4.664 | 1 | .031 | .548 | .318 | .946 |
| Mentioned | 0b | . | . | 0 | . | . | . | . |
| Influencers on social media channels (e.g. YouTube, Instagram, TikTok etc.) | | Not mentioned | -.244 | .314 | .605 | 1 | .437 | .783 | .423 | 1.450 |
| Mentioned | 0b | . | . | 0 | . | . | . | . |
| News consumption frequency | You actively search news several times a day | | | 1.486 | .367 | 16.356 | 1 | .000 | 4.420 | 2.151 | 9.083 |
| You follow the news on a daily basis | | | 1.888 | .322 | 34.343 | 1 | .000 | 6.609 | 3.514 | 12.428 |
| You follow the news from time to time | | | 1.658 | .280 | 35.035 | 1 | .000 | 5.248 | 3.031 | 9.087 |
| You are trying to avoid some news topics | | | 1.228 | .313 | 15.350 | 1 | .000 | 3.415 | 1.847 | 6.313 |
| You actively avoid all news | | | .520 | .269 | 3.748 | 1 | .053 | 1.683 | .994 | 2.850 |
| Don’t know | | | 0b | . | . | 0 | . | . | . | . |
| Messaging apps (e.g. WhatsApp, Messenger, etc.) | Intercept | | | | 11.127 | 1.536 | 52.446 | 1 | .000 |  |  |  |
| Type of community | Rural area or village | | | -.245 | .210 | 1.357 | 1 | .244 | .783 | .518 | 1.182 |
| Small or middle-sized town | | | .211 | .210 | 1.011 | 1 | .315 | 1.235 | .818 | 1.864 |
| Large town | | | 0b | . | . | 0 | . | . | . | . |
| Region | Western Europe | | | -.437 | .231 | 3.579 | 1 | .059 | .646 | .411 | 1.016 |
| Southern Europe | | | .324 | .273 | 1.414 | 1 | .234 | 1.383 | .810 | 2.360 |
| Northern Europe | | | -.217 | .251 | .750 | 1 | .387 | .805 | .493 | 1.316 |
| Eastern Europe | | | 0b | . | . | 0 | . | . | . | . |
| Age education | Up to 15 | | | .513 | .523 | .961 | 1 | .327 | 1.669 | .599 | 4.650 |
| 16-19 | | | .643 | .405 | 2.513 | 1 | .113 | 1.902 | .859 | 4.210 |
| 20 years and older | | | .391 | .401 | .952 | 1 | .329 | 1.479 | .674 | 3.246 |
| Still in full time education | | | .782 | .467 | 2.802 | 1 | .094 | 2.186 | .875 | 5.460 |
| Never been in full time education | | | .879 | .596 | 2.171 | 1 | .141 | 2.407 | .748 | 7.748 |
| Don’t know | | | .315 | .447 | .495 | 1 | .482 | 1.370 | .570 | 3.292 |
| Refusal | | | 0b | . | . | 0 | . | . | . | . |
| Gender | Male | | | .219 | .799 | .075 | 1 | .784 | 1.244 | .260 | 5.959 |
| Female | | | -.037 | .796 | .002 | 1 | .963 | .964 | .202 | 4.590 |
| In other way/Prefer not to say | | | 0b | . | . | 0 | . | . | . | . |
| Age | 15-24 years | | | -.066 | .295 | .049 | 1 | .824 | .937 | .525 | 1.671 |
| 25-39 years | | | -.264 | .253 | 1.094 | 1 | .295 | .768 | .468 | 1.260 |
| 40-54 years | | | -.248 | .254 | .959 | 1 | .327 | .780 | .475 | 1.282 |
| 55 years and older | | | 0b | . | . | 0 | . | . | . | . |
| Occupation | Self employed | | | .285 | .397 | .516 | 1 | .472 | 1.330 | .611 | 2.892 |
| Employee | | | .561 | .358 | 2.445 | 1 | .118 | 1.752 | .868 | 3.537 |
| Manual worker | | | .427 | .414 | 1.062 | 1 | .303 | 1.532 | .680 | 3.451 |
| Without a professional activity | | | .419 | .363 | 1.332 | 1 | .249 | 1.520 | .746 | 3.097 |
| Refusal | | | 0b | . | . | 0 | . | . | . | . |
| Mode of online news access | You directly go to the website or app of the news source, e.g. the website of a newspaper, a magazine, or a TV channel | | Not mentioned | -1.063 | .272 | 15.284 | 1 | .000 | .345 | .203 | .589 |
| Mentioned | 0b | . | . | 0 | . | . | . | . |
| You use a news aggregator app or website, meaning a website or app that assembles information from different sources according to your preselected interests | | Not mentioned | -1.672 | .368 | 20.671 | 1 | .000 | .188 | .091 | .386 |
| Mentioned | 0b | . | . | 0 | . | . | . | . |
| You read articles or posts that appear in your online social networks | | Not mentioned | -1.267 | .253 | 25.137 | 1 | .000 | .282 | .172 | .462 |
| Mentioned | 0b | . | . | 0 | . | . | . | . |
| You read content shared by friends on direct messaging apps | | Not mentioned | -1.685 | .346 | 23.711 | 1 | .000 | .185 | .094 | .365 |
| Mentioned | 0b | . | . | 0 | . | . | . | . |
| Via notifications from news apps you registered to or via alerts you receive | | Not mentioned | -1.485 | .384 | 14.946 | 1 | .000 | .226 | .107 | .481 |
| Mentioned | 0b | . | . | 0 | . | . | . | . |
| Via email newsletter(s) you receive | | Not mentioned | -.352 | .332 | 1.128 | 1 | .288 | .703 | .367 | 1.347 |
| Mentioned | 0b | . | . | 0 | . | . | . | . |
| News topics accessed | Local news | | Not mentioned | -.563 | .235 | 5.727 | 1 | .017 | .570 | .359 | .903 |
| Mentioned | 0b | . | . | 0 | . | . | . | . |
| National politics | | Not mentioned | -.242 | .299 | .655 | 1 | .418 | .785 | .437 | 1.411 |
| Mentioned | 0b | . | . | 0 | . | . | . | . |
| European and international affairs | | Not mentioned | -.175 | .272 | .412 | 1 | .521 | .840 | .492 | 1.432 |
| Mentioned | 0b | . | . | 0 | . | . | . | . |
| Science and technology | | Not mentioned | .174 | .293 | .353 | 1 | .552 | 1.190 | .670 | 2.114 |
| Mentioned | 0b | . | . | 0 | . | . | . | . |
| Sport | | Not mentioned | -.340 | .248 | 1.884 | 1 | .170 | .712 | .438 | 1.157 |
| Mentioned | 0b | . | . | 0 | . | . | . | . |
| Financial and economic news | | Not mentioned | -.516 | .328 | 2.471 | 1 | .116 | .597 | .314 | 1.136 |
| Mentioned | 0b | . | . | 0 | . | . | . | . |
| Culture and art | | Not mentioned | .010 | .280 | .001 | 1 | .971 | 1.010 | .584 | 1.748 |
| Mentioned | 0b | . | . | 0 | . | . | . | . |
| People (e.g. royals, celebrities, etc.) | | Not mentioned | -1.384 | .522 | 7.018 | 1 | .008 | .251 | .090 | .698 |
| Mentioned | 0b | . | . | 0 | . | . | . | . |
| Hobbies, lifestyle | | Not mentioned | -.402 | .255 | 2.475 | 1 | .116 | .669 | .406 | 1.104 |
| Mentioned | 0b | . | . | 0 | . | . | . | . |
| Crime, accidents | | Not mentioned | .185 | .240 | .594 | 1 | .441 | 1.203 | .752 | 1.926 |
| Mentioned | 0b | . | . | 0 | . | . | . | . |
| Trusted news sources | Public TV and radio stations (incl. their online presence) | | Not mentioned | -.325 | .226 | 2.065 | 1 | .151 | .722 | .463 | 1.126 |
| Mentioned | 0b | . | . | 0 | . | . | . | . |
| Private TV and radio stations (incl. their online presence) | | Not mentioned | -.820 | .328 | 6.237 | 1 | .013 | .440 | .231 | .838 |
| Mentioned | 0b | . | . | 0 | . | . | . | . |
| The written press (such as newspapers or magazines), incl. their online presence | | Not mentioned | .142 | .251 | .320 | 1 | .572 | 1.152 | .705 | 1.883 |
| Mentioned | 0b | . | . | 0 | . | . | . | . |
| Other online news platforms incl. blogs, podcasts | | Not mentioned | -.021 | .325 | .004 | 1 | .948 | .979 | .518 | 1.851 |
| Mentioned | 0b | . | . | 0 | . | . | . | . |
| YouTube or other video platforms | | Not mentioned | -.592 | .289 | 4.190 | 1 | .041 | .553 | .314 | .975 |
| Mentioned | 0b | . | . | 0 | . | . | . | . |
| People, groups or friends I follow on social media or messaging platforms | | Not mentioned | -.509 | .285 | 3.189 | 1 | .074 | .601 | .344 | 1.051 |
| Mentioned | 0b | . | . | 0 | . | . | . | . |
| Influencers on social media channels (e.g. YouTube, Instagram, TikTok etc.) | | Not mentioned | -.423 | .322 | 1.733 | 1 | .188 | .655 | .349 | 1.230 |
| Mentioned | 0b | . | . | 0 | . | . | . | . |
| News consumption frequency | You actively search news several times a day | | | 1.514 | .402 | 14.153 | 1 | .000 | 4.544 | 2.065 | 10.000 |
| You follow the news on a daily basis | | | 1.922 | .360 | 28.530 | 1 | .000 | 6.833 | 3.376 | 13.832 |
| You follow the news from time to time | | | 1.381 | .323 | 18.258 | 1 | .000 | 3.977 | 2.111 | 7.492 |
| You are trying to avoid some news topics | | | 1.012 | .359 | 7.964 | 1 | .005 | 2.750 | 1.362 | 5.554 |
| You actively avoid all news | | | .152 | .338 | .202 | 1 | .653 | 1.164 | .600 | 2.260 |
| Don’t know | | | 0b | . | . | 0 | . | . | . | . |
| Blogs | Intercept | | | | 12.818 | 1.597 | 64.420 | 1 | .000 |  |  |  |
| Type of community | Rural area or village | | | -.151 | .229 | .436 | 1 | .509 | .860 | .548 | 1.347 |
| Small or middle-sized town | | | .192 | .225 | .729 | 1 | .393 | 1.212 | .780 | 1.883 |
| Large town | | | 0b | . | . | 0 | . | . | . | . |
| Region | Western Europe | | | -1.196 | .276 | 18.818 | 1 | .000 | .302 | .176 | .519 |
| Southern Europe | | | .744 | .286 | 6.757 | 1 | .009 | 2.104 | 1.201 | 3.688 |
| Northern Europe | | | .071 | .268 | .070 | 1 | .791 | 1.074 | .635 | 1.814 |
| Eastern Europe | | | 0b | . | . | 0 | . | . | . | . |
| Age education | Up to 15 | | | -.407 | .630 | .417 | 1 | .518 | .666 | .194 | 2.288 |
| 16-19 | | | .147 | .451 | .106 | 1 | .745 | 1.158 | .478 | 2.803 |
| 20 years and older | | | .113 | .444 | .064 | 1 | .800 | 1.119 | .469 | 2.674 |
| Still in full time education | | | .318 | .517 | .378 | 1 | .539 | 1.374 | .499 | 3.781 |
| Never been in full time education | | | .913 | .641 | 2.032 | 1 | .154 | 2.492 | .710 | 8.748 |
| Don’t know | | | -.131 | .510 | .066 | 1 | .797 | .877 | .323 | 2.383 |
| Refusal | | | 0b | . | . | 0 | . | . | . | . |
| Gender | Male | | | -.207 | .837 | .061 | 1 | .804 | .813 | .158 | 4.191 |
| Female | | | -.547 | .835 | .430 | 1 | .512 | .579 | .113 | 2.970 |
| In other way/Prefer not to say | | | 0b | . | . | 0 | . | . | . | . |
| Age | 15-24 years | | | -.245 | .324 | .572 | 1 | .449 | .783 | .415 | 1.477 |
| 25-39 years | | | -.329 | .272 | 1.468 | 1 | .226 | .719 | .422 | 1.226 |
| 40-54 years | | | -.294 | .274 | 1.154 | 1 | .283 | .745 | .436 | 1.274 |
| 55 years and older | | | 0b | . | . | 0 | . | . | . | . |
| Occupation | Self employed | | | -.109 | .422 | .067 | 1 | .796 | .896 | .392 | 2.050 |
| Employee | | | .058 | .383 | .023 | 1 | .880 | 1.060 | .500 | 2.246 |
| Manual worker | | | -.298 | .452 | .435 | 1 | .509 | .742 | .306 | 1.801 |
| Without a professional activity | | | -.366 | .392 | .870 | 1 | .351 | .694 | .322 | 1.496 |
| Refusal | | | 0b | . | . | 0 | . | . | . | . |
| Mode of online news access | You directly go to the website or app of the news source, e.g. the website of a newspaper, a magazine, or a TV channel | | Not mentioned | -1.385 | .282 | 24.117 | 1 | .000 | .250 | .144 | .435 |
| Mentioned | 0b | . | . | 0 | . | . | . | . |
| You use a news aggregator app or website, meaning a website or app that assembles information from different sources according to your preselected interests | | Not mentioned | -1.589 | .377 | 17.772 | 1 | .000 | .204 | .097 | .427 |
| Mentioned | 0b | . | . | 0 | . | . | . | . |
| You read articles or posts that appear in your online social networks | | Not mentioned | -1.353 | .263 | 26.428 | 1 | .000 | .259 | .154 | .433 |
| Mentioned | 0b | . | . | 0 | . | . | . | . |
| You read content shared by friends on direct messaging apps | | Not mentioned | -1.213 | .359 | 11.429 | 1 | .001 | .297 | .147 | .601 |
| Mentioned | 0b | . | . | 0 | . | . | . | . |
| Via notifications from news apps you registered to or via alerts you receive | | Not mentioned | -1.455 | .394 | 13.657 | 1 | .000 | .233 | .108 | .505 |
| Mentioned | 0b | . | . | 0 | . | . | . | . |
| Via email newsletter(s) you receive | | Not mentioned | -.800 | .342 | 5.457 | 1 | .019 | .450 | .230 | .879 |
| Mentioned | 0b | . | . | 0 | . | . | . | . |
| News topics accessed | Local news | | Not mentioned | -.306 | .248 | 1.523 | 1 | .217 | .737 | .453 | 1.197 |
| Mentioned | 0b | . | . | 0 | . | . | . | . |
| National politics | | Not mentioned | -.214 | .310 | .475 | 1 | .491 | .807 | .440 | 1.483 |
| Mentioned | 0b | . | . | 0 | . | . | . | . |
| European and international affairs | | Not mentioned | -.206 | .284 | .525 | 1 | .469 | .814 | .466 | 1.421 |
| Mentioned | 0b | . | . | 0 | . | . | . | . |
| Science and technology | | Not mentioned | -.151 | .303 | .248 | 1 | .618 | .860 | .475 | 1.556 |
| Mentioned | 0b | . | . | 0 | . | . | . | . |
| Sport | | Not mentioned | -.455 | .259 | 3.093 | 1 | .079 | .635 | .382 | 1.053 |
| Mentioned | 0b | . | . | 0 | . | . | . | . |
| Financial and economic news | | Not mentioned | -.626 | .337 | 3.446 | 1 | .063 | .535 | .276 | 1.036 |
| Mentioned | 0b | . | . | 0 | . | . | . | . |
| Culture and art | | Not mentioned | .103 | .292 | .126 | 1 | .723 | 1.109 | .626 | 1.965 |
| Mentioned | 0b | . | . | 0 | . | . | . | . |
| People (e.g. royals, celebrities, etc.) | | Not mentioned | -1.565 | .530 | 8.730 | 1 | .003 | .209 | .074 | .590 |
| Mentioned | 0b | . | . | 0 | . | . | . | . |
| Hobbies, lifestyle | | Not mentioned | -.468 | .267 | 3.084 | 1 | .079 | .626 | .371 | 1.056 |
| Mentioned | 0b | . | . | 0 | . | . | . | . |
| Crime, accidents | | Not mentioned | .171 | .252 | .458 | 1 | .499 | 1.186 | .723 | 1.945 |
| Mentioned | 0b | . | . | 0 | . | . | . | . |
| Trusted news sources | Public TV and radio stations (incl. their online presence) | | Not mentioned | -.286 | .240 | 1.420 | 1 | .233 | .751 | .470 | 1.202 |
| Mentioned | 0b | . | . | 0 | . | . | . | . |
| Private TV and radio stations (incl. their online presence) | | Not mentioned | -.810 | .339 | 5.728 | 1 | .017 | .445 | .229 | .864 |
| Mentioned | 0b | . | . | 0 | . | . | . | . |
| The written press (such as newspapers or magazines), incl. their online presence | | Not mentioned | .185 | .264 | .490 | 1 | .484 | 1.203 | .717 | 2.020 |
| Mentioned | 0b | . | . | 0 | . | . | . | . |
| Other online news platforms incl. blogs, podcasts | | Not mentioned | -.383 | .334 | 1.320 | 1 | .251 | .682 | .354 | 1.311 |
| Mentioned | 0b | . | . | 0 | . | . | . | . |
| YouTube or other video platforms | | Not mentioned | -.791 | .300 | 6.945 | 1 | .008 | .454 | .252 | .817 |
| Mentioned | 0b | . | . | 0 | . | . | . | . |
| People, groups or friends I follow on social media or messaging platforms | | Not mentioned | -.455 | .297 | 2.348 | 1 | .125 | .634 | .354 | 1.135 |
| Mentioned | 0b | . | . | 0 | . | . | . | . |
| Influencers on social media channels (e.g. YouTube, Instagram, TikTok etc.) | | Not mentioned | -.621 | .334 | 3.451 | 1 | .063 | .538 | .279 | 1.035 |
| Mentioned | 0b | . | . | 0 | . | . | . | . |
| News consumption frequency | You actively search news several times a day | | | 1.356 | .472 | 8.251 | 1 | .004 | 3.880 | 1.538 | 9.788 |
| You follow the news on a daily basis | | | 1.704 | .434 | 15.403 | 1 | .000 | 5.495 | 2.347 | 12.868 |
| You follow the news from time to time | | | 1.284 | .404 | 10.104 | 1 | .001 | 3.610 | 1.636 | 7.967 |
| You are trying to avoid some news topics | | | .943 | .442 | 4.549 | 1 | .033 | 2.568 | 1.080 | 6.111 |
| You actively avoid all news | | | -.184 | .474 | .152 | 1 | .697 | .832 | .329 | 2.104 |
| Don’t know | | | 0b | . | . | 0 | . | . | . | . |
| You haven’t accessed news in the last 7 days / You do not access news on a regular basis | Intercept | | | | .901 | 1.920 | .220 | 1 | .639 |  |  |  |
| Type of community | Rural area or village | | | -.146 | .234 | .390 | 1 | .532 | .864 | .547 | 1.366 |
| Small or middle-sized town | | | .201 | .233 | .746 | 1 | .388 | 1.223 | .775 | 1.930 |
| Large town | | | 0b | . | . | 0 | . | . | . | . |
| Region | Western Europe | | | -.575 | .250 | 5.303 | 1 | .021 | .563 | .345 | .918 |
| Southern Europe | | | -.268 | .300 | .799 | 1 | .371 | .765 | .425 | 1.376 |
| Northern Europe | | | -.174 | .272 | .408 | 1 | .523 | .840 | .493 | 1.433 |
| Eastern Europe | | | 0b | . | . | 0 | . | . | . | . |
| Age education | Up to 15 | | | .578 | .596 | .941 | 1 | .332 | 1.783 | .554 | 5.736 |
| 16-19 | | | 1.318 | .462 | 8.133 | 1 | .004 | 3.738 | 1.510 | 9.250 |
| 20 years and older | | | .731 | .462 | 2.507 | 1 | .113 | 2.078 | .840 | 5.139 |
| Still in full time education | | | 1.269 | .537 | 5.584 | 1 | .018 | 3.556 | 1.242 | 10.182 |
| Never been in full time education | | | .999 | .679 | 2.167 | 1 | .141 | 2.717 | .718 | 10.280 |
| Don’t know | | | .676 | .507 | 1.775 | 1 | .183 | 1.965 | .727 | 5.309 |
| Refusal | | | 0b | . | . | 0 | . | . | . | . |
| Gender | Male | | | 1.122 | 1.212 | .857 | 1 | .355 | 3.071 | .285 | 33.059 |
| Female | | | 1.202 | 1.208 | .990 | 1 | .320 | 3.328 | .312 | 35.549 |
| In other way/Prefer not to say | | | 0b | . | . | 0 | . | . | . | . |
| Age | 15-24 years | | | -1.128 | .336 | 11.276 | 1 | .001 | .324 | .168 | .625 |
| 25-39 years | | | -.692 | .275 | 6.353 | 1 | .012 | .500 | .292 | .857 |
| 40-54 years | | | -.205 | .272 | .571 | 1 | .450 | .814 | .478 | 1.387 |
| 55 years and older | | | 0b | . | . | 0 | . | . | . | . |
| Occupation | Self employed | | | -.149 | .426 | .122 | 1 | .727 | .862 | .374 | 1.987 |
| Employee | | | .159 | .373 | .181 | 1 | .671 | 1.172 | .564 | 2.437 |
| Manual worker | | | -.548 | .459 | 1.424 | 1 | .233 | .578 | .235 | 1.422 |
| Without a professional activity | | | .256 | .377 | .463 | 1 | .496 | 1.292 | .617 | 2.705 |
| Refusal | | | 0b | . | . | 0 | . | . | . | . |
| Mode of online news access | You directly go to the website or app of the news source, e.g. the website of a newspaper, a magazine, or a TV channel | | Not mentioned | -.508 | .312 | 2.650 | 1 | .104 | .602 | .326 | 1.109 |
| Mentioned | 0b | . | . | 0 | . | . | . | . |
| You use a news aggregator app or website, meaning a website or app that assembles information from different sources according to your preselected interests | | Not mentioned | -.795 | .417 | 3.645 | 1 | .056 | .451 | .200 | 1.021 |
| Mentioned | 0b | . | . | 0 | . | . | . | . |
| You read articles or posts that appear in your online social networks | | Not mentioned | -.736 | .278 | 7.023 | 1 | .008 | .479 | .278 | .826 |
| Mentioned | 0b | . | . | 0 | . | . | . | . |
| You read content shared by friends on direct messaging apps | | Not mentioned | -.917 | .378 | 5.893 | 1 | .015 | .400 | .191 | .838 |
| Mentioned | 0b | . | . | 0 | . | . | . | . |
| Via notifications from news apps you registered to or via alerts you receive | | Not mentioned | -.794 | .428 | 3.438 | 1 | .064 | .452 | .195 | 1.046 |
| Mentioned | 0b | . | . | 0 | . | . | . | . |
| Via email newsletter(s) you receive | | Not mentioned | .177 | .405 | .192 | 1 | .662 | 1.194 | .540 | 2.643 |
| Mentioned | 0b | . | . | 0 | . | . | . | . |
| News topics accessed | Local news | | Not mentioned | -.179 | .265 | .453 | 1 | .501 | .836 | .497 | 1.407 |
| Mentioned | 0b | . | . | 0 | . | . | . | . |
| National politics | | Not mentioned | .205 | .364 | .315 | 1 | .575 | 1.227 | .601 | 2.506 |
| Mentioned | 0b | . | . | 0 | . | . | . | . |
| European and international affairs | | Not mentioned | .320 | .331 | .936 | 1 | .333 | 1.377 | .720 | 2.635 |
| Mentioned | 0b | . | . | 0 | . | . | . | . |
| Science and technology | | Not mentioned | .110 | .341 | .105 | 1 | .746 | 1.117 | .573 | 2.177 |
| Mentioned | 0b | . | . | 0 | . | . | . | . |
| Sport | | Not mentioned | -.037 | .284 | .017 | 1 | .897 | .964 | .552 | 1.683 |
| Mentioned | 0b | . | . | 0 | . | . | . | . |
| Financial and economic news | | Not mentioned | -.062 | .384 | .026 | 1 | .873 | .940 | .443 | 1.997 |
| Mentioned | 0b | . | . | 0 | . | . | . | . |
| Culture and art | | Not mentioned | .285 | .324 | .770 | 1 | .380 | 1.329 | .704 | 2.510 |
| Mentioned | 0b | . | . | 0 | . | . | . | . |
| People (e.g. royals, celebrities, etc.) | | Not mentioned | -1.201 | .558 | 4.627 | 1 | .031 | .301 | .101 | .899 |
| Mentioned | 0b | . | . | 0 | . | . | . | . |
| Hobbies, lifestyle | | Not mentioned | .025 | .288 | .007 | 1 | .932 | 1.025 | .582 | 1.803 |
| Mentioned | 0b | . | . | 0 | . | . | . | . |
| Crime, accidents | | Not mentioned | .672 | .291 | 5.332 | 1 | .021 | 1.958 | 1.107 | 3.463 |
| Mentioned | 0b | . | . | 0 | . | . | . | . |
| Trusted news sources | Public TV and radio stations (incl. their online presence) | | Not mentioned | .015 | .257 | .003 | 1 | .955 | 1.015 | .613 | 1.680 |
| Mentioned | 0b | . | . | 0 | . | . | . | . |
| Private TV and radio stations (incl. their online presence) | | Not mentioned | -.310 | .371 | .700 | 1 | .403 | .733 | .355 | 1.516 |
| Mentioned | 0b | . | . | 0 | . | . | . | . |
| The written press (such as newspapers or magazines), incl. their online presence | | Not mentioned | -.081 | .290 | .078 | 1 | .781 | .922 | .522 | 1.629 |
|  | | Mentioned | 0b | . | . | 0 | . | . | . | . |
| Other online news platforms incl. blogs, podcasts | | Not mentioned | .791 | .412 | 3.678 | 1 | .055 | 2.206 | .983 | 4.951 |
| Mentioned | 0b | . | . | 0 | . | . | . | . |
| YouTube or other video platforms | | Not mentioned | -.206 | .330 | .388 | 1 | .533 | .814 | .426 | 1.555 |
| Mentioned | 0b | . | . | 0 | . | . | . | . |
| People, groups or friends I follow on social media or messaging platforms | | Not mentioned | .068 | .322 | .045 | 1 | .832 | 1.071 | .569 | 2.013 |
| Mentioned | 0b | . | . | 0 | . | . | . | . |
| Influencers on social media channels (e.g. YouTube, Instagram, TikTok etc.) | | Not mentioned | .426 | .392 | 1.185 | 1 | .276 | 1.532 | .711 | 3.300 |
| Mentioned | 0b | . | . | 0 | . | . | . | . |
| News consumption frequency | You actively search news several times a day | | | -.686 | .535 | 1.645 | 1 | .200 | .504 | .177 | 1.436 |
| You follow the news on a daily basis | | | -.382 | .426 | .804 | 1 | .370 | .682 | .296 | 1.574 |
| You follow the news from time to time | | | 1.066 | .325 | 10.779 | 1 | .001 | 2.903 | 1.537 | 5.486 |
| You are trying to avoid some news topics | | | 1.588 | .349 | 20.771 | 1 | .000 | 4.895 | 2.473 | 9.692 |
| You actively avoid all news | | | 1.454 | .292 | 24.857 | 1 | .000 | 4.281 | 2.417 | 7.584 |
| Don’t know | | | 0b | . | . | 0 | . | . | . | . |
| **Model fitting information** | | | | | | | | | | | | |
| Model | Model Fitting Criteria | | | | | | Likelihood Ratio Tests | | | |  |  |
| AIC | BIC | | | -2 Log Likelihood | | Chi-Square | | | df | | p-value |
| Intercept Only | 100401.715 | 100483.350 | | | 100381.715 | |  | | |  | |  |
| Final | 92323.325 | 96323.422 | | | 91343.325 | | 9038.390 | | | 480 | | .000 |
| **Goodness-of-Fit** | | | | | | | | | | | | |
|  | Chi-Square | df | | | p-value | | | | | | | |
| Pearson | 273164.874 | 257240 | | | .000 | | | | | | | |
| Deviance | 91206.675 | 257240 | | | 1.000 | | | | | | | |
| **Pseudo R-Square** | | | | | | | | | | | | |
| Cox and Snell | 0.294 | | | | | | | | | | | |
| Nagelkerke | 0.300 | | | | | | | | | | | |
| McFadden | 0.090 | | | | | | | | | | | |
| **Likelihood Ratio Tests** | | | | | | | | | | | | |
| Effect | Model Fitting Criteria | | | | | | Likelihood Ratio Tests | | | | | |
| AIC of Reduced Model | BIC of Reduced Model | | | -2 Log Likelihood of Reduced Model | | Chi-Square | | df | p-value | | |
| Intercept | 92323.325 | 96323.422 | | | 91343.325a | | .000 | | 0 | . | | |
| European region | 92690.111 | 96445.305 | | | 91770.111 | | 426.786 | | 30 | .000 | | |
| TYPE OF COMMUNITY | 92323.966 | 96160.794 | | | 91383.966 | | 40.641 | | 20 | .004 | | |
| You directly go to the website or app of the news source, e.g. the website of a newspaper, a magazine,or a TV channel | 92703.322 | 96621.785 | | | 91743.322 | | 399.997 | | 10 | .000 | | |
| You use a news aggregator app or website, meaning a website or app that assembles information from different sources according to your preselected interests | 92387.404 | 96305.867 | | | 91427.404 | | 84.079 | | 10 | .000 | | |
| You read articles or posts that appear in your online social networks | 92672.072 | 96590.535 | | | 91712.072 | | 368.748 | | 10 | .000 | | |
| You read content shared by friends on direct messaging apps | 92426.755 | 96345.218 | | | 91466.755 | | 123.430 | | 10 | .000 | | |
| Via notifications from news apps you registered to or via alerts you receive | 92355.403 | 96273.866 | | | 91395.403 | | 52.078 | | 10 | .000 | | |
| Via email newsletter(s) you receive | 92381.242 | 96299.705 | | | 91421.242 | | 77.917 | | 10 | .000 | | |
| Local news | 92346.978 | 96265.441 | | | 91386.978 | | 43.653 | | 10 | .000 | | |
| National politics | 92333.551 | 96252.014 | | | 91373.551 | | 30.226 | | 10 | .001 | | |
| European and international affairs | 92396.825 | 96315.287 | | | 91436.825 | | 93.500 | | 10 | .000 | | |
| Science and technology | 92363.580 | 96282.043 | | | 91403.580 | | 60.255 | | 10 | .000 | | |
| Sport | 92338.703 | 96257.166 | | | 91378.703 | | 35.378 | | 10 | .000 | | |
| Financial and economic news | 92331.557 | 96250.020 | | | 91371.557 | | 28.232 | | 10 | .002 | | |
| Culture and art | 92327.696 | 96246.159 | | | 91367.696 | | 24.371 | | 10 | .007 | | |
| People (e.g. royals, celebrities, etc.) | 92335.005 | 96253.468 | | | 91375.005 | | 31.680 | | 10 | .000 | | |
| Hobbies, lifestyle | 92332.536 | 96250.999 | | | 91372.536 | | 29.212 | | 10 | .001 | | |
| Crime, accidents | 92355.761 | 96274.224 | | | 91395.761 | | 52.436 | | 10 | .000 | | |
| Public TV and radio stations (incl. their online presence) | 92514.928 | 96433.391 | | | 91554.928 | | 211.603 | | 10 | .000 | | |
| Private TV and radio stations (incl. their online presence) | 92360.328 | 96278.791 | | | 91400.328 | | 57.003 | | 10 | .000 | | |
| The written press (such as newspapers or magazines), incl. their online presence | 92535.102 | 96453.565 | | | 91575.102 | | 231.778 | | 10 | .000 | | |
| Other online news platforms incl. blogs, podcasts | 92423.140 | 96341.603 | | | 91463.140 | | 119.815 | | 10 | .000 | | |
| YouTube or other video platforms | 92559.846 | 96478.308 | | | 91599.846 | | 256.521 | | 10 | .000 | | |
| People, groups or friends I follow on social media or messaging platforms | 92402.203 | 96320.666 | | | 91442.203 | | 98.878 | | 10 | .000 | | |
| Influencers on social media channels (e.g. YouTube, Instagram, TikTok etc.) | 92376.526 | 96294.989 | | | 91416.526 | | 73.201 | | 10 | .000 | | |
| Q8 Which of the following statements best describes the way you approach news? | 92875.853 | 96467.777 | | | 91995.853 | | 652.528 | | 50 | .000 | | |
| AGE RECODED - 4 CATEGORIES | 92960.562 | 96715.755 | | | 92040.562 | | 697.237 | | 30 | .000 | | |
| GENDER | 92386.189 | 96223.017 | | | 91446.189 | | 102.864 | | 20 | .000 | | |
| AGE EDUCATION (RECODED 5 CAT) | 92331.768 | 95842.058 | | | 91471.768 | | 128.443 | | 60 | .000 | | |
| OCCUPATION OF RESPONDENT (SCALE) | 92372.480 | 96046.039 | | | 91472.480 | | 129.156 | | 40 | .000 | | |
| a. The reference category is: Don’t know | | | | | | | | | | | | |
| b. This parameter is set to zero because it is redundant. | | | | | | | | | | | | |

**Annex 2 Details regarding regression models estimation**

- **Ordinal regression model**

In general, for an ordinal dependent variable Y, with K ordered categories (e.g., 1 = "You actively search news several times a day," ..., *k* = "Don’t know"), the model estimates the cumulative probability of being in category *k* or below, given the predictors:

(1)

where:

is the log-odds of being in category *k* or below versus being in a higher category.

is the threshold (or intercept) parameter for category *k*, specific to the ordinal structure of the dependent variable. There are *K−1* thresholds.

are coefficients representing the effect of predictor *Xi​* on the log-odds.

*Xi* are predictor variables (e.g., type of community, age, gender, etc.).

*n* represents the total number of predictors.

The model predicts the cumulative probability for *P (Y ≤ k)*, making it suitable for ordinal data where the categories have a natural order. The effect of the predictors is assumed to be the same across all cumulative comparisons (e.g., *P (Y ≤ 1)*, *P (Y ≤ 2)*, etc.). A combination of statistical tests was used to evaluate how well the ordinal model fit.

- **Multinomial logistic regression**

Let *Y* be the dependent variable with *𝐾* categories , *X* be the vector of independent (predictor) variables and be the vector of coefficients for the predictors corresponding to category *k* (relative to the reference category). The probability of *Y* belonging to category *k* is given by:

for (2)

For the reference category *K*, the probability is:

(3)

The model estimates the log-odds of being in category *k* (relative to the reference category *K*):

for (4)

Here, is the linear predictor for category *k*, where *βk* is the coefficient vector associated with the predictors *X*, and represents the odds of being in category *k* versus the reference category *K*.
